# Supplementary material for: Second-generation antipsychotics and the risk of chronic kidney disease: a population-based case-control study
Source: PubMed Central journal article supplement — BMJ Open. 2020 Aug 11;10(8):e038247. doi: 10.1136/bmjopen-2020-038247 (PMC7418669; doi:10.1136/bmjopen-2020-038247), 2020-08-11
Supplement: bmjopen-2020-038247.draft_revisions.pdf [file bmjopen-2020-038247.draft_revisions.pdf]

# BMJ Open

BMJ Open is committed to open peer review. As part of this commitment we make the peer review history of every article we publish publicly available.

When an article is published we post the peer reviewers' comments and the authors' responses online. We also post the versions of the paper that were used during peer review. These are the versions that the peer review comments apply to.

The versions of the paper that follow are the versions that were submitted during the peer review process. They are not the versions of record or the final published versions. They should not be cited or distributed as the published version of this manuscript.

BMJ Open is an open access journal and the full, final, typeset and author-corrected version of record of the manuscript is available on our site with no access controls, subscription charges or pay-per-view fees (<http://bmjopen.bmj.com>).

If you have any questions on BMJ Open's open peer review process please email [info.bmjopen@bmj.com](mailto:info.bmjopen@bmj.com)

# BMJ Open

## Second-generation antipsychotics and the Risk of Chronic Kidney Disease: A Population-based Case-Control Study

|                               |                                                                                                                                                                                                                                                                                                                                                                                                                                                                                                                                                                                                                                                                                                                                                                                                                                                        |
|-------------------------------|--------------------------------------------------------------------------------------------------------------------------------------------------------------------------------------------------------------------------------------------------------------------------------------------------------------------------------------------------------------------------------------------------------------------------------------------------------------------------------------------------------------------------------------------------------------------------------------------------------------------------------------------------------------------------------------------------------------------------------------------------------------------------------------------------------------------------------------------------------|
| Journal:                      | <i>BMJ Open</i>                                                                                                                                                                                                                                                                                                                                                                                                                                                                                                                                                                                                                                                                                                                                                                                                                                        |
| Manuscript ID                 | bmjopen-2020-038247                                                                                                                                                                                                                                                                                                                                                                                                                                                                                                                                                                                                                                                                                                                                                                                                                                    |
| Article Type:                 | Original research                                                                                                                                                                                                                                                                                                                                                                                                                                                                                                                                                                                                                                                                                                                                                                                                                                      |
| Date Submitted by the Author: | 04-Mar-2020                                                                                                                                                                                                                                                                                                                                                                                                                                                                                                                                                                                                                                                                                                                                                                                                                                            |
| Complete List of Authors:     | Højlund, Mikkel; University of Southern Denmark Institute for Public Health, Clinical Pharmacology and Pharmacy; Mental Health Services in the Region of Southern Denmark, Department of Psychiatry Aabenraa<br>Lund, Lars; University of Southern Denmark Institute for Public Health, Clinical Pharmacology and Pharmacy<br>Herping, Jonas; University of Southern Denmark Institute for Public Health, Clinical Pharmacology and Pharmacy<br>Haastrup, Maija; Odense University Hospital, Department of Clinical Biochemistry & Pharmacology<br>Damkier, Per; Odense University Hospital, Department of Clinical Biochemistry & Pharmacology; University of Southern Denmark, Clinical Biochemistry, Department of Clinical Research<br>Henriksen, Daniel Pilsgaard; Odense University Hospital, Department of Clinical Biochemistry & Pharmacology |
| Keywords:                     | CLINICAL PHARMACOLOGY, EPIDEMIOLOGY, Nephrology < INTERNAL MEDICINE, Chronic renal failure < NEPHROLOGY, PSYCHIATRY                                                                                                                                                                                                                                                                                                                                                                                                                                                                                                                                                                                                                                                                                                                                    |
|                               |                                                                                                                                                                                                                                                                                                                                                                                                                                                                                                                                                                                                                                                                                                                                                                                                                                                        |

SCHOLARONE™  
Manuscripts

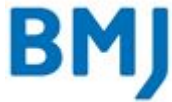

I, the Submitting Author has the right to grant and does grant on behalf of all authors of the Work (as defined in the below author licence), an exclusive licence and/or a non-exclusive licence for contributions from authors who are: i) UK Crown employees; ii) where BMJ has agreed a CC-BY licence shall apply, and/or iii) in accordance with the terms applicable for US Federal Government officers or employees acting as part of their official duties; on a worldwide, perpetual, irrevocable, royalty-free basis to BMJ Publishing Group Ltd ("BMJ") its licensees and where the relevant Journal is co-owned by BMJ to the co-owners of the Journal, to publish the Work in this journal and any other BMJ products and to exploit all rights, as set out in our [licence](#).

The Submitting Author accepts and understands that any supply made under these terms is made by BMJ to the Submitting Author unless you are acting as an employee on behalf of your employer or a postgraduate student of an affiliated institution which is paying any applicable article publishing charge ("APC") for Open Access articles. Where the Submitting Author wishes to make the Work available on an Open Access basis (and intends to pay the relevant APC), the terms of reuse of such Open Access shall be governed by a Creative Commons licence – details of these licences and which [Creative Commons](#) licence will apply to this Work are set out in our licence referred to above.

Other than as permitted in any relevant BMJ Author's Self Archiving Policies, I confirm this Work has not been accepted for publication elsewhere, is not being considered for publication elsewhere and does not duplicate material already published. I confirm all authors consent to publication of this Work and authorise the granting of this licence.

## Second-generation antipsychotics and the Risk of Chronic Kidney Disease: A Population-based Case-Control Study

Mikkel Højlund MD 1,2, Lars C. Lund MD 1, Jonas L. E. Herping MD 1, Maija B. Haastrup MD 3, Per Damkier MD Professor PhD 3,4, Daniel P. Henriksen MD PhD 3

- 1) Clinical Pharmacology and Pharmacy, Department of Public Health, University of Southern Denmark, Odense, Denmark
- 2) Department of Psychiatry Aabenraa, Mental Health Services Region of Southern Denmark, Aabenraa, Denmark
- 3) Department of Clinical Biochemistry & Pharmacology, Odense University Hospital, Odense, Denmark
- 4) Clinical Biochemistry, Department of Clinical Research, University of Southern Denmark, Odense, Denmark

**Word count:** 2112, **Tables:** 3, **Figures:** 2, **References:** 22

### Corresponding author:

Mr. Mikkel Højlund, Department of Public Health, Clinical Pharmacology and Pharmacy, University of Southern Denmark, J.B. Winsløws Vej 19, 2<sup>nd</sup> floor, DK-5000 Odense, Denmark. Email: [mhoejlund@health.sdu.dk](mailto:mhoejlund@health.sdu.dk), phone: +45 6550 4660.

**Abstract (279/300 words)****Objectives:**

To examine the association between use of second-generation antipsychotics (SGA) and the risk of chronic kidney disease (CKD).

**Design:** Population-based case-control study

**Setting:** Routinely collected laboratory, prescription, and diagnostic information on all inhabitants with creatinine measurements residing on the island of Funen, Denmark (2001-2015).

**Participants:** 21,434 cases with incident CKD matched with 85,576 CKD-free population controls by risk-set sampling using age, sex, and calendar year.

**Primary and secondary outcome measures:**

CKD was defined as an eGFR below 60 ml/min/1.73m<sup>2</sup> in a period longer than three months. Information on drug exposure and comorbidities were obtained from the Danish National Prescription Register and the Danish National Patient Register. We calculated odds ratios (OR) for the association between SGA use and CKD using conditional logistic regression.

**Results:**

Use of SGAs was associated with increased risk of CKD among ever-users (OR 1.24, 95%CI: 1.12-1.37) and current users (OR 1.26, 95%CI: 1.12-1.42). We found no clear evidence of dose-response-relationship. Both short duration (1-2 antipsychotic prescriptions; OR 1.22, 95%CI: 1.01-1.48), as well as long-term use (>30 prescriptions; OR 1.45, 95%CI 1.19-1.76) were associated with an increased risk of CKD. Both use of SGAs with mild and high risk of metabolic disturbances was associated with increased risk of CKD (OR 1.21, 95%CI: 1.06-1.39 and 1.36, 95%CI: 1.11-1.68 respectively). Recent use of NSAIDs, prior use of lithium, hypertension, or prior AKI were not clearly associated with development of CKD in connection to SGA exposure. The highest risk of CKD was found for clozapine (OR 1.81, 95%CI: 1.22-2.69).

**Conclusions:**

Use of SGA is associated with a small-to-moderately increased risk of incident CKD. All investigated second-generation antipsychotics, except for aripiprazole, were associated with an increased risk of CKD.

**Keywords:**

Antipsychotics, chronic kidney disease, case-control study

**Article summary:****Strengths and limitations of this study**

- Improved outcome definition by incorporating creatinine levels to estimate glomerular filtration, which enabled us to include cases of chronic kidney disease who were not treated at hospitals or specialized nephrology departments.
- Inclusion of information on comorbidity and prescriptions with high validity from Danish National Health Registers.
- Population-based design in a population, which are considered representative for the general Danish population.
- Limited number of antipsychotic users among cases, and very few users of second-generation antipsychotics with low risk of metabolic disturbances, such as aripiprazole.
- Information on general risk factors for disease as overweight, smoking and lifestyle were not available.

## INTRODUCTION

Antipsychotics are primarily used for maintenance treatment in schizophrenia and some cases of bipolar affective disorder. Such maintenance treatment is often year- or life-long, which makes tolerability an important concern in choosing and adhering to treatment. Second generation antipsychotics (SGA) are associated with a number of adverse effects including weight gain, metabolic syndrome, diabetes, and cardiovascular disease<sup>1,2</sup>. Observational studies have linked SGAs to an increased risk of acute kidney injury (AKI)<sup>3,4</sup> and chronic kidney disease (CKD)<sup>5,6</sup>.

CKD can develop in several ways: Following AKI, as a complication to metabolic syndrome and diabetes (diabetic nephropathy), or as a complication to cardiovascular disease, either hypertension (hypertensive nephropathy) or arteriosclerosis<sup>7</sup>. Use of SGAs has been associated with all these conditions. Therefore, maintenance treatment with antipsychotics might contribute to the development of CKD, which is important as the mortality of patients with end-stage renal disease is comparable to patients with coronary heart disease<sup>8</sup>.

Prior studies on the association of SGAs and CKD have used hospital discharge diagnoses of CKD as outcome definitions<sup>5,6</sup>. In advanced stages, CKD will result in hospitalization, dialysis, kidney transplantation or death, but less severe stages of CKD are usually handled in primary care, which are not recorded in the administrative registers.

We aimed to investigate the association between use of SGAs and the subsequent risk of CKD by combining prescription information with laboratory data to substantiate the outcome definition.

## METHODS

We undertook a population-based case-control study of incident CKD-cases among inhabitants residing on the island of Funen, Denmark who - between 2001 and 2015 - had at least two measurements of creatinine performed. We compared the use of SGAs among CKD-cases to that of a disease-free control population.

### Data sources

We used information from the Funen Laboratory Cohort (FLaC). A more detailed description of FLaC has been published elsewhere<sup>9</sup>. In summary, FLaC contains information regarding all biochemistry and laboratory results of all Funen inhabitants who, within the study period, had at least one measurement of plasma creatinine performed. A total of 460,365 patients out of 693,843 Funen inhabitants, had their creatinine measured in this period, comprising a total of 7,742,124 creatinine samples. We linked this information to several nationwide Danish administrative registers: Danish Civil Registration System<sup>10,11</sup>, The Danish National Patient Registry<sup>12</sup>, Registers in Statistics Denmark recording education level<sup>13</sup>, and The Danish National Prescription Registry<sup>14</sup>. As the Danish National Health Service provides universal tax-supported healthcare for the entire Danish population, and as all Danish inhabitants are assigned a unique personal 10-digit identified (Central Personal Register (CPR) number) at birth, it is possible to conduct true population-based register-linkage studies covering the entire population<sup>10</sup>.

## Population

All adults with two or more recorded creatinine values and living on Funen and the surrounding islands in the period January 2001 to December 2015 were eligible for inclusion in the study. Funen is a part of the Region of Southern Denmark, and is considered representative for the entire Danish population<sup>15</sup>. For each individual, an observation period was defined, starting at the first creatinine measurement during the study period and ending with the last creatinine measurement. Only individuals with normal kidney function were included. In case of emigration from the island of Funen, the observation period ended on the last date of creatinine measurement prior to emigration.

## Cases

Cases were defined as individuals with incident CKD during the observation period. We defined CKD according to the KDIGO guidelines<sup>16</sup> as the first measurement of eGFR below 60 ml/min/1.73m<sup>2</sup>. The date of this measurement defined the index date. In order to ensure that cases had CKD, the first eGFR measured three months after the index date also had to be below 60 ml/min/1.73m<sup>2</sup>, as well as all the measurements in the in-between period (from the index date to 3 months after). The eGFR was calculated according to the CKD<sub>epi</sub> formula<sup>17</sup>. Individuals with a discharge diagnosis of renal disease according to the definition of possible CKD, as proposed by Kessing et al.<sup>18</sup> prior to the date of biochemical CKD were excluded. (ICD-10: N18-N19.9 inclusive plus N00, N01, N03, N04, N05, N06, N8.8 plus N14.1, N14.2, N16.8, N17, N25.1, N26, and N27). Individuals with any eGFR measurement below 60 ml/min/1.73m<sup>2</sup> up to one year prior to the study start, were also excluded.

## Controls

Four population controls were matched on age, sex, and calendar time to each case and assigned an index date corresponding to the case's date of diagnosis. We used risk-set sampling and excluded controls who fulfilled the same exclusion criteria as described for cases. To ensure that controls had not developed CKD since their last creatinine measurement, all controls were required to have a creatinine recorded at least one year after the index date. This measurement had to be above or equal to 60 ml/min/1.73m<sup>2</sup>. Cases could be selected as controls before they became cases, and we allowed the study population to be selected as controls more than once. Because of these criteria the generated odds ratio (OR) is considered an unbiased estimate of the incidence rate ratio. Please refer to figure 1 for a graphical depiction of the study design.

< figure 1 around here >

## Drug exposure

We obtained information on all filled prescriptions of SGAs and used the defined daily dose (DDD), according to the WHO Collaborating Centre for Drug Statistics methodology<sup>19</sup>. We used the DDDs as a surrogate marker of the cumulative exposure but converted them into olanzapine equivalents<sup>20</sup>. For an overview of the ATC codes and the corresponding DDDs, please refer to the supplementary appendix. The DDDs, determined by the WHO, are based on doses in maintenance



1  
2  
3  
4 treatment of schizophrenia. We used the number of filled prescriptions as a  
5 surrogate marker of duration of use, as many of the drugs are used off-label in lower  
6 doses than for treatment of schizophrenia.  
7

### 8 9 **Statistical analyses**

10 We used conditional logistic regression to estimate odds ratios (OR) with 95%  
11 confidence interval (CI) for the association between SGA-use and the risk of CKD.  
12 Our primary outcome was risk of CKD in relation to ever use of SGA. Secondary  
13 outcomes were risk of CKD in relation to current use, cumulative exposure, and  
14 cumulative duration. We computed a crude and adjusted ORs (aOR), where the  
15 adjusted model included the following predefined clinically relevant potential  
16 confounders: prior use of lithium, recent use of NSAIDs, diabetes, hypertension, and  
17 highest achieved level of education. We conducted subgroup analyses by stratifying  
18 on metabolic risk of SGA as proposed by De Hert et al.<sup>2</sup>, individual SGAs, diabetes,  
19 hypertension, and prior AKI. R version 3.5.1 (R Core Team, Vienna, Austria) was  
20 used for all analyses.  
21  
22

### 23 24 **Patient and public involvement**

25 No patients were involved in designing the study  
26

### 27 28 **Approval**

29 This study was approved by the Danish Data Protection Agency (j.nr 2008-58-0034)  
30 and the Danish Patient Safety Authority (j.nr. 3-3013-809/1). According to Danish  
31 law, studies based solely on register data do not require approval from an ethics  
32 review board<sup>21</sup>.  
33

### 34 35 **RESULTS**

36 We identified 21.434 cases with incident CKD in Funen County between 2001 and  
37 2016, with 48% males and a median age of 71 years (IQR 64-78 years). Using risk-  
38 set sampling, cases were matched by sex, age, and calendar year to 85.576 CKD-  
39 free population controls. Hypertension and diabetes were more prevalent among  
40 cases than controls at baseline (65 vs 55% and 14 vs 10% respectively). The most  
41 commonly used SGA among cases and controls was risperidone. See table 1 for  
42 further details.  
43

44  
45 < table 1 around here >  
46

### 47 48 *Main analysis:*

49 Among cases, 557 (2.6%) were ever-users of SGAs, compared to 1731 (2.0%) of  
50 controls yielding an adjusted OR of 1.24 (95%CI: 1.12-1.37). The corresponding  
51 adjusted OR for current use was 1.26 (95%CI: 1.12-1.42). We did not find evidence  
52 of a dose-response-relationship, neither in relation to cumulative use nor in relation  
53 to duration of use (see table 2). Short duration measured as 1-2 antipsychotic  
54 prescriptions, as well as long-term use (>30 prescriptions) were both associated with  
55 increased risk (see table 2).  
56

57  
58 < table 2 around here >  
59  
60

### *Subgroup analysis:*

The majority of cases and controls used SGAs with mild risk of metabolic disturbances (e.g. risperidone), followed by SGAs with high risk (e.g. clozapine and olanzapine), and moderate risk (e.g. quetiapine). Use of SGAs with mild and high risk of metabolic disturbances was associated with increased risk of CKD in the adjusted model (OR<sub>mildrisk</sub> 1.21, 95%CI: 1.06-1.39 and OR<sub>highrisk</sub> 1.36, 95%CI: 1.11-1.68) (see table 3).

Users of SGAs, who also had diabetes, had an 50% increased risk of developing CKD compared to controls, but due to the low number of exposed diabetics, the confidence interval overlapped unity (aOR<sub>diabetes</sub> 1.52, 95%CI: 0.90-2.54). Antipsychotic users in the low age category, had an increased risk of CKD compared to the higher age category (aOR<sub><65years</sub> 1.50, 95%CI: 1.25-1.80). None of the other known risk factors for CKD (use of NSAIDs, hypertension, and prior AKI) were clearly associated with development of CKD in connection to SGA exposure (see table 3).

< table 3 around here >

### *Specific SGAs:*

All SGAs, except for aripiprazole, were associated with increased risk of CKD. The risk was most pronounced for clozapine (aOR 1.81, 95%CI: 1.22-2.69) followed by olanzapine (aOR 1.41, 95%CI: 1.19-1.65) and quetiapine (aOR 1.28, 95%CI: 1.17-1.42).

< figure 2 around here >

## **DISCUSSION**

In this large population-based study using routinely collected eGFR to define CKD, we found that ever-users of SGAs had a higher risk of developing CKD compared to never-users. However, there was no clear evidence of a dose-response-relationship, and several known risk factors for CKD did not substantially increase the risk of developing CKD (e.g. NSAID use, prior lithium use, prior AKI<sup>7</sup>). We found a further increased risk of developing CKD among individuals with diabetes, and among those below 65 years of age at the time of CKD-diagnosis, although the risk among diabetics was not significant. For individual antipsychotics, the use of clozapine or olanzapine was associated with the highest risk of developing.

Regarding the overall risk of developing CKD in connection to treatment with SGAs, our main findings are in line with previous studies: Tzeng and colleagues<sup>5</sup> found a similar increased risk of CKD among individuals with schizophrenia during three years of follow-up. (HR 1.36, 95%CI: 1.13-1.63), and Wang and colleagues substantiated this finding by observing an increased risk of CKD among individuals with more than 90 and 1000 days of SGA exposure (OR 1.42 and 1.30 respectively)<sup>6</sup>.

In our current study we observed a 52% increased risk of developing CKD for antipsychotic-users who also had diabetes compared to non-diabetics, although not statistically significant. Development of CKD and later potentially end-stage renal

disease (ESRD) is a well-established complication of diabetes<sup>22</sup>, and our finding might underscore the importance of regular monitoring of kidney-function in this population. CKD-prevalence is related to age, as nephron-loss and the prevalence of medical conditions generally increases with age<sup>7</sup>. Our finding of the highest risk among the younger age group might be explained by a higher proportion of long-term antipsychotic use for severe mental illness in this age category, whereas antipsychotic use in the older age category might represent short-term and/or low-dose use in conditions as dementia and delirium. Analysis of the individual SGAs in connection to CKD found the highest risk associated with olanzapine and clozapine, which was expected as these SGAs are associated with the highest risk of metabolic disturbances and diabetes<sup>1</sup>.

The primary strength of the present study is the improved outcome definition. By using creatinine levels to estimate glomerular filtration, we can include CKD-cases who are not treated at hospitals and specialized nephrology departments. A considerable proportion of CKD-cases might be handled in general practice until severe or ESRD is present. These cases would be missed if our outcome definition only relied on hospital diagnoses. Secondly, the linkage to Danish registers allowed us to obtain high quality information on comorbidity and prescriptions. Lastly, the population of Funen is considered representative for the general Danish population<sup>15</sup>.

However, some limitations must be acknowledged: The number of antipsychotic users among CKD-cases was generally low, and most users had very short duration of antipsychotic use (i.e.  $\leq 2$  prescriptions). Our population included few users with high cumulative doses (i.e.  $>3650$  mg olanzapine-equivalents), as well as very few users of SGAs with low risk of metabolic disturbances, such as aripiprazole. This means that our dose-response analysis is likely to underestimate the cumulative dose and an associated risk in this sub-population. Also, information on general risk factors for disease as overweight, smoking and lifestyle are not included in our data sources.

In conclusion, we found a small-to-moderately increased risk of incident CKD among individuals using second-generation antipsychotics. All investigated second-generation antipsychotics, except for aripiprazole, were associated with an increased risk of CKD.

**Acknowledgements:** None

**Author contributions:** LCL, JLEH, MH and DPH initiated and designed the study. LCL analysed the data. MH and DPH drafted the manuscript. All authors critically revised the manuscript and approved the submission.

**Funding:** This study was partially supported by two grants: one from the Beckett foundation (Copenhagen, Denmark) and from Hede-Nielsen family foundation (Horsens, Denmark). The founders had no role in designing the study or deciding to submit the manuscript.

**Competing interests:** The authors declare no competing interests.

**Patient consent:** Not required

**Data sharing statement:** No additional data available.

## References

1. Correll CU, Detraux J, De Lepeleire J, De Hert M. Effects of antipsychotics, antidepressants and mood stabilizers on risk for physical diseases in people with schizophrenia, depression and bipolar disorder. *World Psychiatry*. 2015;14(2):119-136. doi:10.1002/wps.20204
2. De Hert M, Detraux J, van Winkel R, Yu W, Correll CU. Metabolic and cardiovascular adverse effects associated with antipsychotic drugs. *Nat Rev Endocrinol*. 2011;8(2):114-126. doi:10.1038/nrendo.2011.156
3. Hwang YJ, Dixon SN, Reiss JP, et al. Atypical antipsychotic drugs and the risk for acute kidney injury and other adverse outcomes in older adults: a population-based cohort study. *Ann Intern Med*. 2014;161(4):242-248. doi:10.7326/M13-2796
4. Jiang Y, McCombs JS, Park SH. A Retrospective Cohort Study of Acute Kidney Injury Risk Associated with Antipsychotics. *CNS Drugs*. 2017;31(4):319-326. doi:10.1007/s40263-017-0421-4
5. Tzeng N-S, Hsu Y-H, Ho S-Y, et al. Is schizophrenia associated with an increased risk of chronic kidney disease? A nationwide matched-cohort study. *BMJ Open*. 2015;5(1):e006777-e006777. doi:10.1136/bmjopen-2014-006777
6. Wang H-Y, Huang CL-C, Feng IJ, Tsuang H-C. Second-generation antipsychotic medications and risk of chronic kidney disease in schizophrenia: population-based nested case-control study. *BMJ Open*. 2018;8(5):e019868. doi:10.1136/bmjopen-2017-019868
7. Romagnani P, Remuzzi G, Glassock R, et al. Chronic kidney disease. *Nat Rev Dis Primer*. 2017;3(1). doi:10.1038/nrdp.2017.88
8. de Jager DJ, Grootendorst DC, Jager KJ, et al. Cardiovascular and noncardiovascular mortality among patients starting dialysis. *JAMA*. 2009;302(16):1782-1789. doi:10.1001/jama.2009.1488
9. Henriksen DP, Damkier P, Hallas J, Nybo M. Sixteen years of creatinine measurements among 460 000 individuals-The Funen Laboratory Cohort (FLaC), a population-based pharmacoepidemiological resource to study drug-induced kidney disease. *Basic Clin Pharmacol Toxicol*. 2019;124(5):582-590. doi:10.1111/bcpt.13167
10. Pedersen CB. The Danish Civil Registration System. *Scand J Public Health*. 2011;39(7 Suppl):22-25. doi:10.1177/1403494810387965
11. Schmidt M, Pedersen L, Sørensen HT. The Danish Civil Registration System as a tool in epidemiology. *Eur J Epidemiol*. 2014;29(8):541-549. doi:10.1007/s10654-014-9930-3

12. Schmidt M, Schmidt SAJ, Sandegaard JL, Ehrenstein V, Pedersen L, Sørensen HT. The Danish National Patient Registry: a review of content, data quality, and research potential. *Clin Epidemiol*. 2015;7:449-490. doi:10.2147/CLEP.S91125
13. Jensen VM, Rasmussen AW. Danish Education Registers. *Scand J Public Health*. 2011;39(7 Suppl):91-94. doi:10.1177/1403494810394715
14. Pottegård A, Schmidt SAJ, Wallach-Kildemoes H, Sørensen HT, Hallas J, Schmidt M. Data Resource Profile: The Danish National Prescription Registry. *Int J Epidemiol*. 2017;46(3):798-798f. doi:10.1093/ije/dyw213
15. Henriksen DP, Rasmussen L, Hansen MR, Hallas J, Pottegård A. Comparison of the Five Danish Regions Regarding Demographic Characteristics, Healthcare Utilization, and Medication Use--A Descriptive Cross-Sectional Study. *PloS One*. 2015;10(10):e0140197. doi:10.1371/journal.pone.0140197
16. KDIGO 2012 Clinical Practice Guideline for the Evaluation and Management of Chronic Kidney Disease. *KDIGO 2012 Clin Pract Guidel Eval Manag Chronic Kidney Dis*. 2013;3(1):1-150. doi:10.1038/kisup.2012.77
17. Stevens LA, Schmid CH, Greene T, et al. Comparative Performance of the CKD Epidemiology Collaboration (CKD-EPI) and the Modification of Diet in Renal Disease (MDRD) Study Equations for Estimating GFR Levels Above 60 mL/min/1.73 m<sup>2</sup>. *Am J Kidney Dis Off J Natl Kidney Found*. 2010;56(3):486-495. doi:10.1053/j.ajkd.2010.03.026
18. Kessing LV, Gerds TA, Feldt-Rasmussen B, Andersen PK, Licht RW. Use of Lithium and Anticonvulsants and the Rate of Chronic Kidney Disease: A Nationwide Population-Based Study. *JAMA Psychiatry*. 2015;72(12):1182-1191. doi:10.1001/jamapsychiatry.2015.1834
19. WHOCC - ATC/DDD Index. [https://www.whooc.no/atc\\_ddd\\_index/](https://www.whooc.no/atc_ddd_index/). Accessed April 29, 2019.
20. Leucht S, Samara M, Heres S, Davis JM. Dose Equivalents for Antipsychotic Drugs: The DDD Method. *Schizophr Bull*. 2016;42 Suppl 1:S90-94. doi:10.1093/schbul/sbv167
21. Thygesen LC, Daasnes C, Thaulow I, Brønnum-Hansen H. Introduction to Danish (nationwide) registers on health and social issues: structure, access, legislation, and archiving. *Scand J Public Health*. 2011;39(7 Suppl):12-16. doi:10.1177/1403494811399956
22. Anders H-J, Huber TB, Isermann B, Schiffer M. CKD in diabetes: diabetic kidney disease versus nondiabetic kidney disease. *Nat Rev Nephrol*. 2018;14(6):361-377. doi:10.1038/s41581-018-0001-y

**LEGENDS TO FIGURES**

Figure 1: Graphical representation of time periods, case definition, control selection and covariate assessment

Figure 2: Association between exposure to second-generation antipsychotics and the risk of chronic kidney disease by individual drugs

For peer review only



**Table 1: Characteristics of cases and controls**

| Characteristic                      | Cases, N (%) | Controls, N (%) |
|-------------------------------------|--------------|-----------------|
| Total                               | 21,434       | 85,576          |
| Male sex                            | 10,277 (48)  | 41,010 (48)     |
| Age, median (IQR)                   | 71 (64-78)   | 71 (64-78)      |
| Mental disorders                    |              |                 |
| Schizophrenia                       | 74 (<1)      | 217 (<1)        |
| Bipolar disease                     | 120 (1)      | 356 (<1)        |
| Dementia                            | 122 (1)      | 366 (<1)        |
| Other co-morbidities                |              |                 |
| Diabetes                            | 3,057 (14)   | 8,138 (10)      |
| Hypertension                        | 13,962 (65)  | 47,095 (55)     |
| Antipsychotic exposure              |              |                 |
| Second-generation antipsychotics    | 557 (3)      | 1731 (2)        |
| Quetiapine                          | 173 (1)      | 504 (1)         |
| Aripiprazole                        | 8 (<1)       | 41 (<1)         |
| Risperidone                         | 299 (1)      | 967 (1)         |
| Olanzapine                          | 220 (1)      | 593 (1)         |
| Clozapine                           | 37 (<1)      | 82 (<1)         |
| Exposure to other medications       |              |                 |
| Prior use of Lithium                | 210 (1)      | 563 (1)         |
| Recent use of NSAIDs                | 5,610 (26)   | 20,081 (23)     |
| Highest achieved level of education |              |                 |
| Level 1                             | 10,250 (48)  | 38,385 (45)     |
| Level 2                             | 6,785 (32)   | 27,778 (32)     |
| Level 3                             | 2,687 (13)   | 12,727 (15)     |

**Table 2: Odds ratios (OR) for chronic kidney disease with use of second-generation antipsychotics**

| Exposure                        | Cases, N (%)<br>(N = 21434) | Controls, N (%)<br>(N = 85576) | Crude OR         | Adjusted OR      |
|---------------------------------|-----------------------------|--------------------------------|------------------|------------------|
| Never use                       | 20877                       | 83845                          | 1 (ref)          | 1 (ref)          |
| Ever use                        | 557 (3)                     | 1731 (2)                       | 1.29 (1.17-1.42) | 1.24 (1.12-1.37) |
| Current use                     | 399 (2)                     | 1206 (1)                       | 1.32 (1.18-1.49) | 1.26 (1.12-1.42) |
| Cumulative use (olanzapine eq.) |                             |                                |                  |                  |
| 0-899mg                         | 380 (2)                     | 1246 (1)                       | 1.22 (1.09-1.37) | 1.17 (1.04-1.32) |
| 900-1799mg                      | 52 (<1)                     | 124 (<1)                       | 1.70 (1.23-2.36) | 1.60 (1.15-2.23) |
| 1800-3649mg                     | 29 (<1)                     | 121 (<1)                       | 0.96 (0.64-1.43) | 0.91 (0.60-1.38) |
| >3650mg                         | 96 (<1)                     | 240 (<1)                       | 1.60 (1.26-2.03) | 1.46 (1.14-1.86) |
| Number of prescriptions         |                             |                                |                  |                  |
| 1-2                             | 144 (1)                     | 450 (1)                        | 1.28 (1.06-1.54) | 1.22 (1.01-1.48) |
| 3-4                             | 76 (<1)                     | 236 (<1)                       | 1.28 (0.98-1.66) | 1.24 (0.95-1.62) |
| 5-10                            | 68 (<1)                     | 240 (<1)                       | 1.14 (0.87-1.50) | 1.06 (0.80-1.39) |
| 11-30                           | 115 (1)                     | 409 (<1)                       | 1.12 (0.91-1.38) | 1.10 (0.89-1.36) |
| >30                             | 154 (1)                     | 396 (<1)                       | 1.57 (1.30-1.89) | 1.45 (1.19-1.76) |



**Table 3: Association between exposure to second-generation antipsychotics and the risk of chronic kidney disease by subgroups (risk of metabolic disturbances, recent use of NSAIDs, pre-existing diabetes, hypertension, prior acute kidney injury (AKI), and age)**

| Exposure     |               | Cases, N (%) | Controls, N (%) | Crude OR (95% CI) | Adjusted OR (95% CI) |
|--------------|---------------|--------------|-----------------|-------------------|----------------------|
|              |               | N = 21434    | N = 85576       |                   |                      |
| SGA          | Low risk      | 8 (1)        | 41 (2)          | 0.85 (0.39-1.82)  | 0.71 (0.32-1.54)     |
|              | Mild risk     | 298 (54)     | 947 (55)        | 1.26 (1.10-1.44)  | 1.21 (1.06-1.39)     |
|              | Moderate risk | 118 (21)     | 372 (21)        | 1.28 (1.04-1.58)  | 1.19 (0.96-1.48)     |
|              | High risk     | 133 (24)     | 371 (21)        | 1.43 (1.17-1.74)  | 1.36 (1.11-1.68)     |
| NSAID        | No            | 15824 (74)   | 65495 (77)      | 1.29 (1.15-1.45)  | 1.22 (1.08-1.38)     |
|              | Yes           | 5610 (26)    | 20081 (23)      | 1.13 (0.84-1.51)  | 1.10 (0.81-1.49)     |
| Diabetes     | No            | 18377 (86)   | 77438 (90)      | 1.27 (1.14-1.41)  | 1.24 (1.11-1.39)     |
|              | Yes           | 3057 (14)    | 8138 (10)       | 1.56 (0.96-2.53)  | 1.52 (0.90-2.54)     |
| Hypertension | No            | 7472 (35)    | 38481 (45)      | 1.43 (1.19-1.72)  | 1.33 (1.10-1.60)     |
|              | Yes           | 13962 (65)   | 47095 (55)      | 1.21 (1.05-1.39)  | 1.14 (0.98-1.32)     |
| Prior AKI    | No            | 18998 (89)   | 83099 (97)      | 1.31 (1.18-1.47)  | 1.27 (1.14-1.42)     |
|              | Yes           | 2436 (11)    | 2477 (3)        | 1.24 (0.59-2.58)  | 0.96 (0.45-2.07)     |
| Age group    | <65           | 5847 (27)    | 23423 (27)      | 1.66 (1.40-1.97)  | 1.50 (1.25-1.80)     |
|              | 65+           | 15587 (73)   | 62153 (73)      | 1.15 (1.02-1.30)  | 1.13 (1.00-1.28)     |

**Index date**  
(Case: eGFR < 60, 1st CKD;  
Control: Assigned date)

Eligibility criteria:

Living on funen on 01-01-2001

Min. 2 creatinine measurements

Ever use Dx

Covariates:  
Current use

eGFR  
< 60

Exclusion:  
Prior CKD or AKI  
Age < 18

Control:  
First eGFR > 60  
[day 1; day 365]

Case:  
Median eGFR < 60  
[day 91; day 365]

Observation period

1st creatinine  
after 01-01-2001

Last creatinine

1  
2  
3  
4  
5  
6  
7  
8  
9  
10  
11  
12  
13  
14  
15  
16  
17  
18  
19  
20  
21  
22  
23  
24  
25  
26  
27  
28  
29  
30  
31  
32  
33  
34  
35  
36  
37  
38  
39  
40

aOR (95%CI)

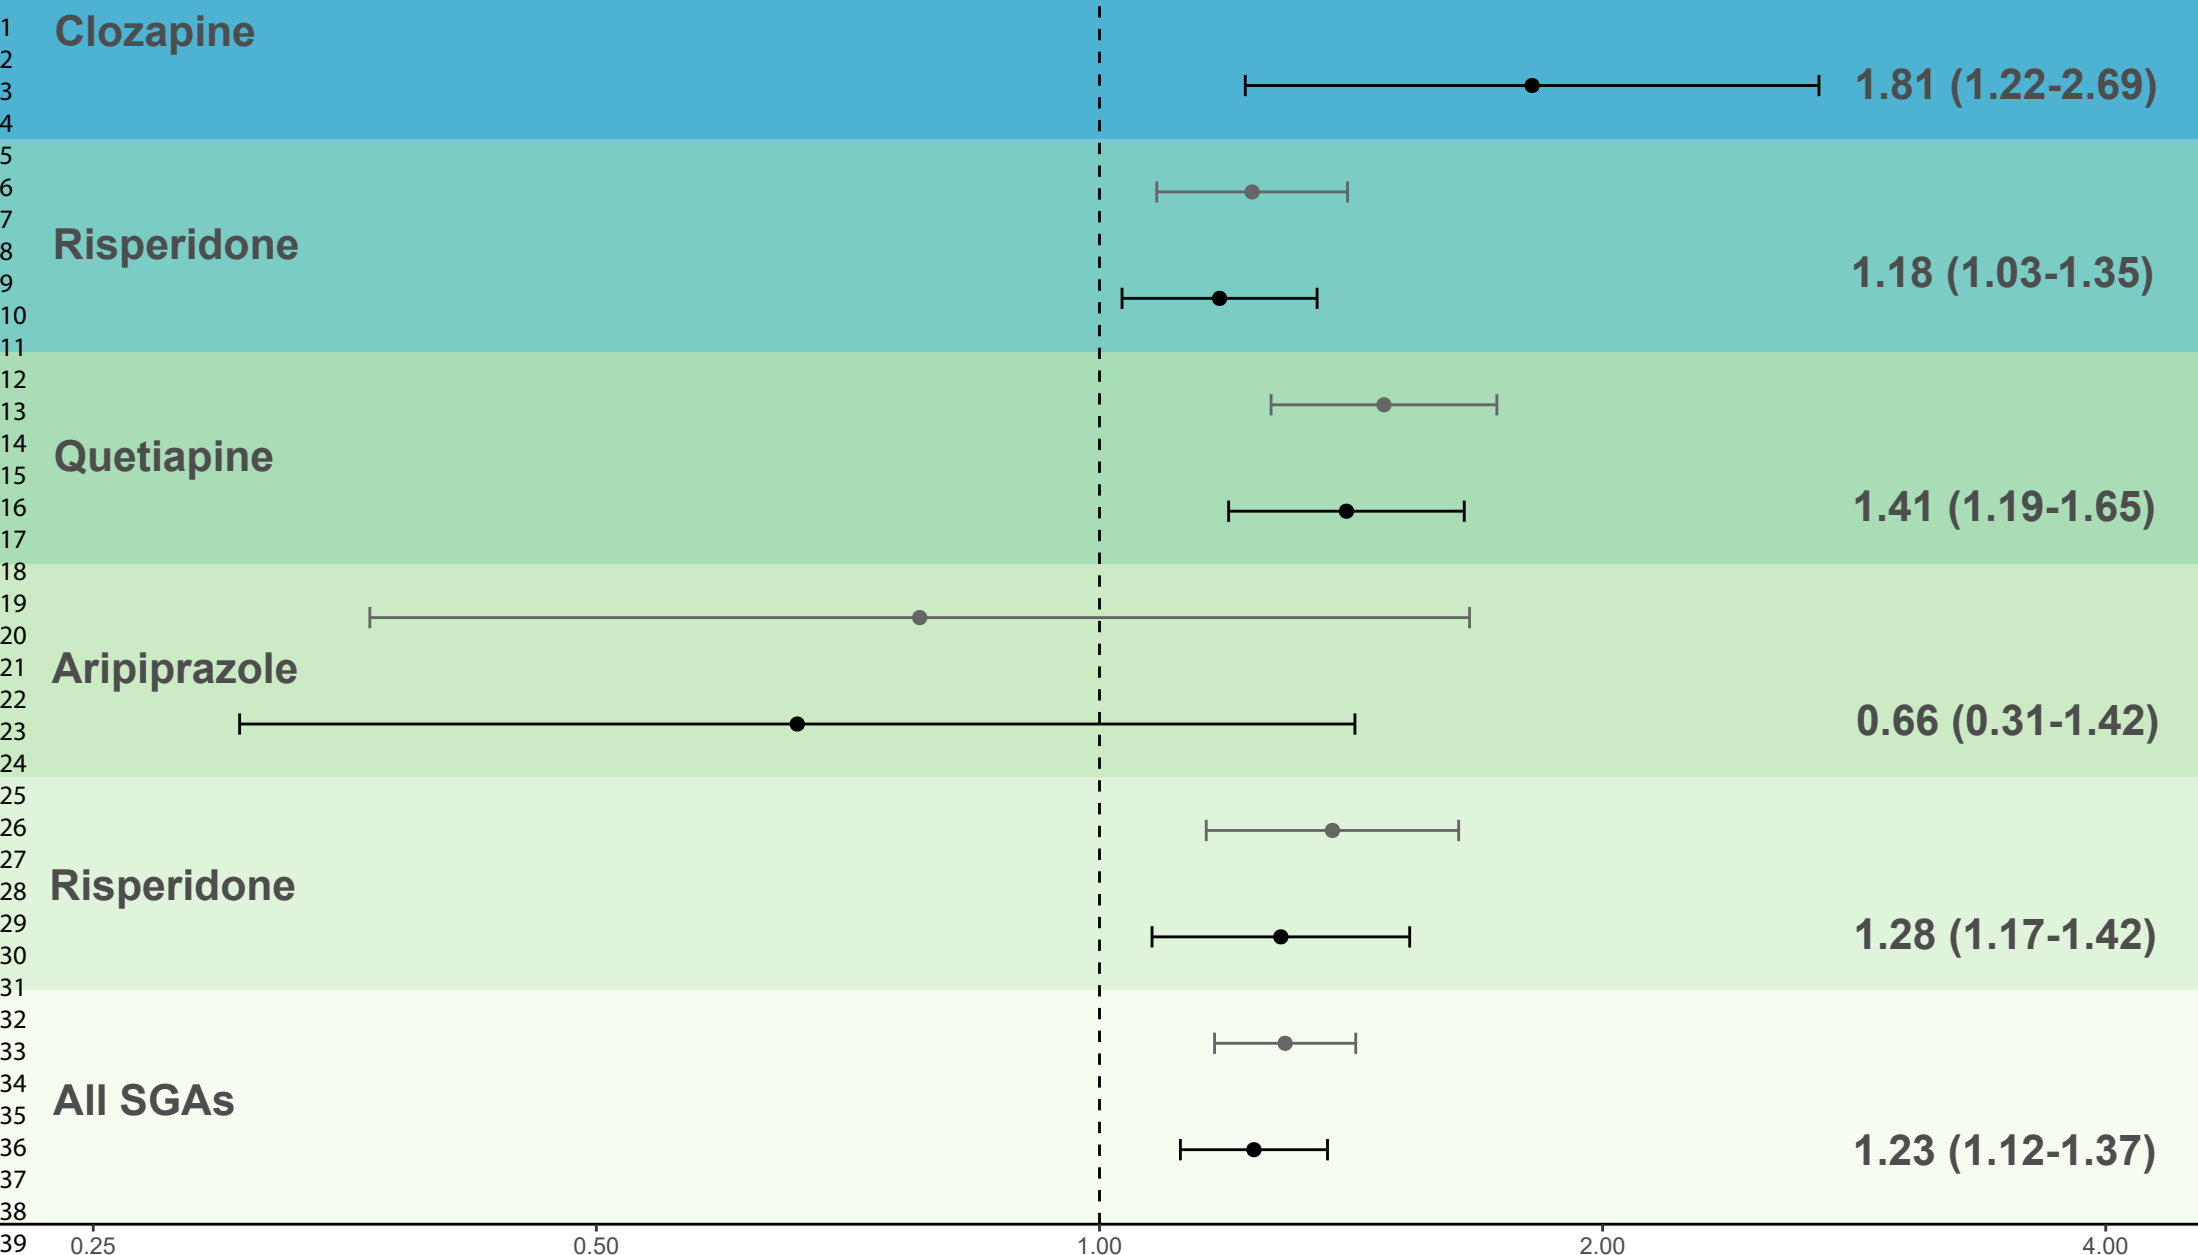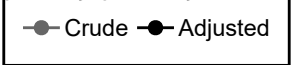

## Appendix 1: Definitions

| <b>Study drugs</b><br>(Second-generation antipsychotics) | ATC code                                                           | DDD<br>(mg) | Equivalent to 1mg<br>olanzapine (mg) | Risk of metabolic<br>disturbances |
|----------------------------------------------------------|--------------------------------------------------------------------|-------------|--------------------------------------|-----------------------------------|
| Aripiprazole                                             | N05AX12                                                            | 15          | 1.5                                  | Low                               |
| Clozapine                                                | N05AH02                                                            | 300         | 30                                   | High                              |
| Olanzapine                                               | N05AH03                                                            | 10          | -                                    | High                              |
| Risperidone                                              | N05AX08                                                            | 5           | 0.5                                  | Mild                              |
| Quetiapine                                               | N05AH04                                                            | 400         | 40                                   | Moderate                          |
| <b>Other medications</b>                                 |                                                                    |             |                                      |                                   |
| Non-steroidal anti-inflammatory drugs (NSAIDs)           | M01A, excl. M01AX01                                                |             |                                      |                                   |
| Lithium                                                  | N05AN01                                                            |             |                                      |                                   |
| <b>Comorbidities</b>                                     | Definition                                                         |             |                                      |                                   |
| Diabetes                                                 | Use of ATC-group A10                                               |             |                                      |                                   |
| Hypertension                                             | Use of ATC-group C03A, C08C, C09A, C09C                            |             |                                      |                                   |
| Possible CKD                                             | ICD-10: N00, 01, 03-06, 08.8, 14.1, 14.2, 16.8, 17-19, 25.1, 26-27 |             |                                      |                                   |
| Schizophrenia                                            | ICD-10: F20                                                        |             |                                      |                                   |
| Bipolar affective disorder                               | ICD-10: F30-31                                                     |             |                                      |                                   |
| Dementia                                                 | ICD-10: F00-03 and G30-31                                          |             |                                      |                                   |

STROBE 2007 (v4) Statement—Checklist of items that should be included in reports of case-control studies

| Section/Topic             | Item # | Recommendation                                                                                                                                                                       | Reported on page # |
|---------------------------|--------|--------------------------------------------------------------------------------------------------------------------------------------------------------------------------------------|--------------------|
| Title and abstract        | 1      | (a) Indicate the study’s design with a commonly used term in the title or the abstract                                                                                               | 1                  |
|                           |        | (b) Provide in the abstract an informative and balanced summary of what was done and what was found                                                                                  | 2                  |
| <b>Introduction</b>       |        |                                                                                                                                                                                      |                    |
| Background/rationale      | 2      | Explain the scientific background and rationale for the investigation being reported                                                                                                 | 4                  |
| Objectives                | 3      | State specific objectives, including any prespecified hypotheses                                                                                                                     | 4                  |
| <b>Methods</b>            |        |                                                                                                                                                                                      |                    |
| Study design              | 4      | Present key elements of study design early in the paper                                                                                                                              | 4                  |
| Setting                   | 5      | Describe the setting, locations, and relevant dates, including periods of recruitment, exposure, follow-up, and data collection                                                      | 4-5                |
| Participants              | 6      | (a) Give the eligibility criteria, and the sources and methods of case ascertainment and control selection. Give the rationale for the choice of cases and controls                  | 5                  |
|                           |        | (b) For matched studies, give matching criteria and the number of controls per case                                                                                                  | 5                  |
| Variables                 | 7      | Clearly define all outcomes, exposures, predictors, potential confounders, and effect modifiers. Give diagnostic criteria, if applicable                                             | 5-6                |
| Data sources/ measurement | 8*     | For each variable of interest, give sources of data and details of methods of assessment (measurement). Describe comparability of assessment methods if there is more than one group | 4-6                |
| Bias                      | 9      | Describe any efforts to address potential sources of bias                                                                                                                            | 6                  |
| Study size                | 10     | Explain how the study size was arrived at                                                                                                                                            | 5                  |
| Quantitative variables    | 11     | Explain how quantitative variables were handled in the analyses. If applicable, describe which groupings were chosen and why                                                         | 5-6                |
| Statistical methods       | 12     | (a) Describe all statistical methods, including those used to control for confounding                                                                                                | 6                  |
|                           |        | (b) Describe any methods used to examine subgroups and interactions                                                                                                                  | 6                  |
|                           |        | (c) Explain how missing data were addressed                                                                                                                                          | -                  |
|                           |        | (d) If applicable, explain how matching of cases and controls was addressed                                                                                                          | 5                  |
|                           |        | (e) Describe any sensitivity analyses                                                                                                                                                | -                  |
| <b>Results</b>            |        |                                                                                                                                                                                      |                    |

|                          |     |                                                                                                                                                                                                                                                                                                                                                                                                               |                          |
|--------------------------|-----|---------------------------------------------------------------------------------------------------------------------------------------------------------------------------------------------------------------------------------------------------------------------------------------------------------------------------------------------------------------------------------------------------------------|--------------------------|
| Participants             | 13* | (a) Report numbers of individuals at each stage of study—eg numbers potentially eligible, examined for eligibility, confirmed eligible, included in the study, completing follow-up, and analysed<br>(b) Give reasons for non-participation at each stage<br>(c) Consider use of a flow diagram                                                                                                               | 6<br>-<br>-              |
| Descriptive data         | 14* | (a) Give characteristics of study participants (eg demographic, clinical, social) and information on exposures and potential confounders<br>(b) Indicate number of participants with missing data for each variable of interest                                                                                                                                                                               | 6, table 1<br>-          |
| Outcome data             | 15* | Report numbers in each exposure category, or summary measures of exposure                                                                                                                                                                                                                                                                                                                                     | 6                        |
| Main results             | 16  | (a) Give unadjusted estimates and, if applicable, confounder-adjusted estimates and their precision (eg, 95% confidence interval). Make clear which confounders were adjusted for and why they were included<br>(b) Report category boundaries when continuous variables were categorized<br>(c) If relevant, consider translating estimates of relative risk into absolute risk for a meaningful time period | 6-7, table 2+3<br>-<br>- |
| Other analyses           | 17  | Report other analyses done—eg analyses of subgroups and interactions, and sensitivity analyses                                                                                                                                                                                                                                                                                                                | 7, table 2+3             |
| <b>Discussion</b>        |     |                                                                                                                                                                                                                                                                                                                                                                                                               |                          |
| Key results              | 18  | Summarise key results with reference to study objectives                                                                                                                                                                                                                                                                                                                                                      | 7                        |
| Limitations              | 19  | Discuss limitations of the study, taking into account sources of potential bias or imprecision.<br>Discuss both direction and magnitude of any potential bias                                                                                                                                                                                                                                                 | 8                        |
| Interpretation           | 20  | Give a cautious overall interpretation of results considering objectives, limitations, multiplicity of analyses, results from similar studies, and other relevant evidence                                                                                                                                                                                                                                    | 7-8                      |
| Generalisability         | 21  | Discuss the generalisability (external validity) of the study results                                                                                                                                                                                                                                                                                                                                         | 8                        |
| <b>Other information</b> |     |                                                                                                                                                                                                                                                                                                                                                                                                               |                          |
| Funding                  | 22  | Give the source of funding and the role of the funders for the present study and, if applicable, for the original study on which the present article is based                                                                                                                                                                                                                                                 | 8                        |

\*Give information separately for cases and controls in case-control studies and, if applicable, for exposed and unexposed groups in cohort and cross-sectional studies.

**Note:** An Explanation and Elaboration article discusses each checklist item and gives methodological background and published examples of transparent reporting. The STROBE checklist is best used in conjunction with this article (freely available on the Web sites of PLoS Medicine at <http://www.plosmedicine.org/>, Annals of Internal Medicine at <http://www.annals.org/>, and Epidemiology at <http://www.epidem.com/>). Information on the STROBE Initiative is available at [www.strobe-statement.org](http://www.strobe-statement.org).

# BMJ Open

## Second-generation antipsychotics and the Risk of Chronic Kidney Disease: A Population-based Case-Control Study

|                                 |                                                                                                                                                                                                                                                                                                                                                                                                                                                                                                                                                                                                                                                                                                                                                                                                                                                        |
|---------------------------------|--------------------------------------------------------------------------------------------------------------------------------------------------------------------------------------------------------------------------------------------------------------------------------------------------------------------------------------------------------------------------------------------------------------------------------------------------------------------------------------------------------------------------------------------------------------------------------------------------------------------------------------------------------------------------------------------------------------------------------------------------------------------------------------------------------------------------------------------------------|
| Journal:                        | <i>BMJ Open</i>                                                                                                                                                                                                                                                                                                                                                                                                                                                                                                                                                                                                                                                                                                                                                                                                                                        |
| Manuscript ID                   | bmjopen-2020-038247.R1                                                                                                                                                                                                                                                                                                                                                                                                                                                                                                                                                                                                                                                                                                                                                                                                                                 |
| Article Type:                   | Original research                                                                                                                                                                                                                                                                                                                                                                                                                                                                                                                                                                                                                                                                                                                                                                                                                                      |
| Date Submitted by the Author:   | 13-May-2020                                                                                                                                                                                                                                                                                                                                                                                                                                                                                                                                                                                                                                                                                                                                                                                                                                            |
| Complete List of Authors:       | Højlund, Mikkel; University of Southern Denmark Institute for Public Health, Clinical Pharmacology and Pharmacy; Mental Health Services in the Region of Southern Denmark, Department of Psychiatry Aabenraa<br>Lund, Lars; University of Southern Denmark Institute for Public Health, Clinical Pharmacology and Pharmacy<br>Herping, Jonas; University of Southern Denmark Institute for Public Health, Clinical Pharmacology and Pharmacy<br>Haastrup, Maija; Odense University Hospital, Department of Clinical Biochemistry & Pharmacology<br>Damkier, Per; Odense University Hospital, Department of Clinical Biochemistry & Pharmacology; University of Southern Denmark, Clinical Biochemistry, Department of Clinical Research<br>Henriksen, Daniel Pilsgaard; Odense University Hospital, Department of Clinical Biochemistry & Pharmacology |
| <b>Primary Subject Heading</b>: | Epidemiology                                                                                                                                                                                                                                                                                                                                                                                                                                                                                                                                                                                                                                                                                                                                                                                                                                           |
| Secondary Subject Heading:      | Diabetes and endocrinology, Pharmacology and therapeutics, Renal medicine, Mental health                                                                                                                                                                                                                                                                                                                                                                                                                                                                                                                                                                                                                                                                                                                                                               |
| Keywords:                       | CLINICAL PHARMACOLOGY, EPIDEMIOLOGY, Nephrology < INTERNAL MEDICINE, Chronic renal failure < NEPHROLOGY, PSYCHIATRY                                                                                                                                                                                                                                                                                                                                                                                                                                                                                                                                                                                                                                                                                                                                    |
|                                 |                                                                                                                                                                                                                                                                                                                                                                                                                                                                                                                                                                                                                                                                                                                                                                                                                                                        |

SCHOLARONE™  
Manuscripts



I, the Submitting Author has the right to grant and does grant on behalf of all authors of the Work (as defined in the below author licence), an exclusive licence and/or a non-exclusive licence for contributions from authors who are: i) UK Crown employees; ii) where BMJ has agreed a CC-BY licence shall apply, and/or iii) in accordance with the terms applicable for US Federal Government officers or employees acting as part of their official duties; on a worldwide, perpetual, irrevocable, royalty-free basis to BMJ Publishing Group Ltd ("BMJ") its licensees and where the relevant Journal is co-owned by BMJ to the co-owners of the Journal, to publish the Work in this journal and any other BMJ products and to exploit all rights, as set out in our [licence](#).

The Submitting Author accepts and understands that any supply made under these terms is made by BMJ to the Submitting Author unless you are acting as an employee on behalf of your employer or a postgraduate student of an affiliated institution which is paying any applicable article publishing charge ("APC") for Open Access articles. Where the Submitting Author wishes to make the Work available on an Open Access basis (and intends to pay the relevant APC), the terms of reuse of such Open Access shall be governed by a Creative Commons licence – details of these licences and which [Creative Commons](#) licence will apply to this Work are set out in our licence referred to above.

Other than as permitted in any relevant BMJ Author's Self Archiving Policies, I confirm this Work has not been accepted for publication elsewhere, is not being considered for publication elsewhere and does not duplicate material already published. I confirm all authors consent to publication of this Work and authorise the granting of this licence.



## Second-generation antipsychotics and the Risk of Chronic Kidney Disease: A Population-based Case-Control Study

Mikkel Højlund MD 1,2, Lars C. Lund MD 1, Jonas L. E. Herping MD 1, Maija B. Haastrup MD 3, Per Damkier MD Professor PhD 3,4, Daniel P. Henriksen MD PhD 3

- 1) Clinical Pharmacology and Pharmacy, Department of Public Health, University of Southern Denmark, Odense, Denmark
- 2) Department of Psychiatry Aabenraa, Mental Health Services Region of Southern Denmark, Aabenraa, Denmark
- 3) Department of Clinical Biochemistry & Pharmacology, Odense University Hospital, Odense, Denmark
- 4) Clinical Biochemistry, Department of Clinical Research, University of Southern Denmark, Odense, Denmark

**Word count:** 2716, **Tables:** 3, **Figures:** 2, **References:** 26

### Corresponding author:

Mr. Mikkel Højlund, Department of Public Health, Clinical Pharmacology and Pharmacy, University of Southern Denmark, J.B. Winsløvs Vej 19, 2<sup>nd</sup> floor, DK-5000 Odense, Denmark. Email: [mhoejlund@health.sdu.dk](mailto:mhoejlund@health.sdu.dk), phone: +45 6550 4660.

**Abstract (279/300 words)****Objectives:**

To examine the association between use of second-generation antipsychotics (SGA) and the risk of chronic kidney disease (CKD).

**Design:** Population-based case-control study

**Setting:** Routinely collected laboratory, prescription, and diagnostic information on all inhabitants with creatinine measurements residing on the island of Funen, Denmark (2001-2015).

**Participants:** 21,434 cases with incident CKD matched with 85,576 CKD-free population controls by risk-set sampling using age, sex, and calendar year.

**Primary and secondary outcome measures:**

CKD was defined as an eGFR below 60 ml/min/1.73m<sup>2</sup> in a period longer than three months. Information on drug exposure and comorbidities were obtained from the Danish National Prescription Register and the Danish National Patient Register. We calculated odds ratios (OR) for the association between SGA use and CKD using conditional logistic regression.

**Results:**

Use of SGAs was associated with increased risk of CKD among ever-users (OR 1.24, 95%CI: 1.12-1.37) and current users (OR 1.26, 95%CI: 1.12-1.42). We found no clear evidence of dose-response-relationship. Both short duration (1-2 antipsychotic prescriptions; OR 1.22, 95%CI: 1.01-1.48), as well as long-term use (>30 prescriptions; OR 1.45, 95%CI 1.19-1.76) were associated with an increased risk of CKD. Both use of SGAs with mild and high risk of metabolic disturbances was associated with increased risk of CKD (OR 1.21, 95%CI: 1.06-1.39 and 1.36, 95%CI: 1.11-1.68 respectively). Recent use of NSAIDs, prior use of lithium, hypertension, or prior AKI were not clearly associated with development of CKD in connection to SGA exposure. The highest risk of CKD was found for clozapine (OR 1.81, 95%CI: 1.22-2.69).

**Conclusions:**

Use of SGA is associated with a small-to-moderately increased risk of incident CKD. All investigated second-generation antipsychotics, except for aripiprazole, were associated with an increased risk of CKD.

**Keywords:**

Antipsychotics, chronic kidney disease, case-control study

**Article summary:****Strengths and limitations of this study**

- Improved outcome definition by incorporating creatinine levels to estimate glomerular filtration, which enabled us to include cases of chronic kidney disease who were not treated at hospitals or specialized nephrology departments.
- Inclusion of information on comorbidity and prescriptions with high validity from Danish National Health Registers.
- Population-based design in a population, which are considered representative for the general Danish population.
- Limited number of antipsychotic users among cases, and very few users of second-generation antipsychotics with low risk of metabolic disturbances, such as aripiprazole.
- Information on general risk factors for disease as overweight, smoking and lifestyle were not available.

## INTRODUCTION

Antipsychotics are primarily labelled for maintenance treatment in schizophrenia, bipolar affective disorder, and insufficiently responding unipolar depression, but are also used commonly in a number of other psychiatric conditions<sup>1</sup>. Maintenance treatment in chronic conditions is often year- or life-long, which makes tolerability an important concern in choosing and adhering to treatment. Furthermore, the risk of acute adverse events associated with antipsychotics are relevant to both long-term treatment and to episodic treatment. Second generation antipsychotics (SGA) are associated with a number of adverse effects including weight gain, metabolic syndrome, diabetes, and cardiovascular disease<sup>2,3</sup>. Observational studies have linked SGAs to an increased risk of both acute kidney injury (AKI)<sup>4,5</sup> and chronic kidney disease (CKD)<sup>6,7</sup>.

CKD can develop in several ways: Following AKI, as a complication to metabolic syndrome and diabetes (diabetic nephropathy), or as a complication to cardiovascular disease, either hypertension (hypertensive nephropathy) or arteriosclerosis<sup>8</sup>. Use of SGAs has been associated with all these conditions. For example, case reports have described clozapine, olanzapine, and quetiapine to be associated with interstitial nephritis and AKI<sup>9,10</sup>. Therefore, maintenance treatment with antipsychotics might contribute to the development of CKD, which is important as the mortality of patients with end-stage renal disease is comparable to patients with coronary heart disease<sup>11</sup>.

Prior studies on the association of SGAs and CKD have used hospital discharge diagnoses of CKD as outcome definitions<sup>6,7</sup>. In advanced stages, CKD will result in hospitalization, dialysis, kidney transplantation or death, but less severe stages of CKD are usually handled in primary care, which are not recorded in the administrative registers.

We aimed to investigate the association between use of SGAs and the subsequent risk of CKD by combining prescription information with laboratory data to substantiate the outcome definition.

## METHODS

We undertook a population-based case-control study of incident CKD-cases among inhabitants residing on the island of Funen, Denmark who - between 2001 and 2015 - had at least two measurements of creatinine performed. We compared the use of SGAs among CKD-cases to that of a disease-free control population.

### Data sources

We used information from the Funen Laboratory Cohort (FLaC). A more detailed description of FLaC has been published elsewhere<sup>12</sup>. In summary, FLaC contains information regarding all biochemistry and laboratory results of all Funen inhabitants who, within the study period, had at least one measurement of plasma creatinine performed. A total of 460,365 patients out of 693,843 Funen inhabitants, had their creatinine measured in this period, comprising a total of 7,742,124 creatinine samples. We linked this information to several nationwide Danish administrative registers: Danish Civil Registration System<sup>13,14</sup>, The Danish National Patient Registry<sup>15</sup>, Registers in Statistics Denmark recording education level<sup>16</sup>, and The Danish National Prescription Registry<sup>17</sup>. As the Danish National Health Service provides universal tax-supported healthcare for the entire Danish population, and as all Danish inhabitants are assigned a unique personal 10-digit identified (Central Personal Register (CPR) number) at birth, it is possible to conduct true population-based register-linkage studies covering the entire population<sup>13</sup>.

### Population

All adults with two or more recorded creatinine values and living on Funen and the surrounding islands in the period January 2001 to December 2015 were eligible for inclusion in the study. Funen is a part of the Region of Southern Denmark, and is considered representative for the entire Danish population<sup>18</sup>. For each individual, an observation period was defined, starting at the first creatinine measurement during the study period and ending with the last creatinine measurement. Only individuals with normal kidney function were included. In case of emigration from the island of Funen, the observation period ended on the last date of creatinine measurement prior to emigration.

### Cases

Cases were defined as individuals with incident CKD during the observation period. We defined CKD according to the KDIGO guidelines<sup>19</sup> as the first measurement of eGFR below 60 ml/min/1.73m<sup>2</sup>. The date of this measurement defined the index date. In order to ensure that cases had CKD, the first eGFR measured three months after the index date also had to be below 60 ml/min/1.73m<sup>2</sup>, as well as all the measurements in the in-between period (from the index date to 3 months after). The eGFR was calculated according to the CKD<sub>epi</sub> formula<sup>20</sup>. Individuals with a discharge diagnosis of renal disease according to the definition of possible CKD, as proposed by Kessing et al.<sup>21</sup> prior to the date of biochemical CKD were excluded. (ICD-10: N18-N19.9 inclusive plus N00, N01, N03, N04, N05, N06, N8.8 plus N14.1, N14.2, N16.8, N17, N25.1, N26, and N27). Individuals with any eGFR measurement below 60 ml/min/1,73m<sup>2</sup> up to one year prior to the study start, were also excluded.

### Controls

Four population controls were matched on age, sex, and calendar time to each case and assigned an index date corresponding to the case's date of diagnosis. We used risk-set sampling and excluded controls who fulfilled the same exclusion criteria as described for cases. To ensure that controls had not developed CKD since their last creatinine measurement, all controls were required to have at least one creatinine recorded in the year after the index date. This measurement had to be above or equal to 60 ml/min/1.73m<sup>2</sup>. Cases could be selected as controls before they became cases, and we allowed the study population to be selected as controls more than once. Because of these criteria, the generated odds ratio (OR) is considered an unbiased estimate of the incidence rate ratio. Please refer to figure 1 for a graphical depiction of the study design.

< figure 1 around here >

### Drug exposure

We obtained information on all filled prescriptions of SGAs and used the defined daily dose (DDD), according to the WHO Collaborating Centre for Drug Statistics methodology<sup>22</sup>. We used the DDDs as a surrogate marker of the cumulative exposure but converted them into olanzapine equivalents<sup>23</sup>. For an overview of the ATC codes and the corresponding DDDs, please refer to appendix 1. The DDDs, determined by the WHO, are based on doses in maintenance treatment of schizophrenia. We used the number of filled prescriptions as a surrogate marker of duration of use, as many of the drugs are used off-label in lower doses than for treatment of schizophrenia.

### Covariates

We included the following potential confounders in our analysis: i) Age, sex and calendar time (accounted for by sampling procedure), ii) use of other drugs known to affect renal function (lithium, NSAIDs), iii) history of hypertension and diabetes, and iv) highest achieved level of education as a proxy for socioeconomic status. Use of lithium was defined as any filling of prescriptions for lithium before the index date. Recent use of NSAIDs was defined as filling of prescriptions within one year before the index date. Relevant ICD-10 diagnoses and ATC-codes are listed in appendix 1.

### Statistical analyses

We used conditional logistic regression to estimate odds ratios (OR) with 95% confidence interval (CI) for the association between SGA-use and the risk of CKD. Our primary outcome was risk of CKD in relation to ever use of SGA. Secondary outcomes were risk of CKD in relation to current use, cumulative exposure, and cumulative duration. We computed a crude and adjusted ORs (aOR), where the adjusted model included the following predefined clinically relevant potential confounders: prior use of lithium, recent use of NSAIDs, diabetes, hypertension, and highest achieved level of education. We conducted subgroup analyses by stratifying on metabolic risk of SGA as proposed by De Hert et al.<sup>3</sup>, cumulative dose, individual SGAs, diabetes, hypertension, and prior AKI. To explore a potential dose response relation, we performed a supplementary analysis, using conditional logistic regression amongst all users of SGA and restricted cubic splines with knots placed at the value for the 10<sup>th</sup>, 50<sup>th</sup> and 90<sup>th</sup> percentile for cumulative doses. We conducted

1  
2  
3  
4 a sensitivity analysis where eligible controls were not required to have normal  
5 eGFR measurement(s) in the year following the index date to assess the potential of  
6 selection bias with this criterion. Furthermore, we conducted control analyses to  
7 assess the association between CKD and known risk factors (history of diabetes or  
8 hypertension, and use of lithium or NSAIDs), and between a negative control  
9 exposure and CKD (topical ocular antibiotics – not considered associated with CKD).  
10 R version 3.5.1 (R Core Team, Vienna, Austria) was used for all analyses.  
11  
12

### 13 **Patient and public involvement**

14 No patients were involved in designing the study  
15  
16

### 17 **Approval**

18 This study was approved by the Danish Data Protection Agency (j.nr 2008-58-0034)  
19 and the Danish Patient Safety Authority (j.nr. 3-3013-809/1). According to Danish  
20 law, studies based solely on register data do not require approval from an ethics  
21 review board<sup>24</sup>.  
22  
23  
24  
25  
26  
27  
28  
29  
30  
31  
32  
33  
34  
35  
36  
37  
38  
39  
40  
41  
42  
43  
44  
45  
46  
47  
48  
49  
50  
51  
52  
53  
54  
55  
56  
57  
58  
59  
60



## RESULTS

We identified 21.434 cases with incident CKD in Funen County between 2001 and 2016, with 48% males and a median age of 71 years (IQR 64-78 years). Using risk-set sampling, cases were matched by sex, age, and calendar year to 85.576 CKD-free population controls. Hypertension and diabetes were more prevalent among cases than controls at baseline (65 vs 55% and 14 vs 10% respectively). ORs for the association between risk factors and CKD presented in appendix 2. The most commonly used SGA among cases and controls was risperidone. See table 1 for further details.

< table 1 around here >

### *Main analysis:*

Among cases, 557 (2.6%) were ever-users of SGAs, compared to 1731 (2.0%) of controls yielding an adjusted OR of 1.24 (95%CI: 1.12-1.37). The corresponding adjusted OR for current use was 1.26 (95%CI: 1.12-1.42). We did not find evidence of a dose-response-relationship, using predefined categories neither in relation to cumulative use nor in relation to duration of use (see table 2). Short duration measured as 1-2 antipsychotic prescriptions, as well as long-term use (>30 prescriptions) were both associated with increased risk (see table 2).

< table 2 around here >

### *Subgroup analysis:*

The majority of cases and controls used SGAs with mild risk of metabolic disturbances (e.g. risperidone), followed by SGAs with high risk (e.g. clozapine and olanzapine), and moderate risk (e.g. quetiapine). Use of SGAs with mild and high risk of metabolic disturbances was associated with increased risk of CKD in the adjusted model ( $OR_{\text{mildrisk}} 1.21$ , 95%CI: 1.06-1.39 and  $OR_{\text{highrisk}} 1.36$ , 95%CI: 1.11-1.68) (see table 3).

Users of SGAs, who also had diabetes, had an 50% increased risk of developing CKD compared to controls, but due to the low number of exposed diabetics, the confidence interval overlapped unity ( $aOR_{\text{diabetes}} 1.52$ , 95%CI: 0.90-2.54). Antipsychotic users in the low age category, had an increased risk of CKD compared to the higher age category ( $aOR_{<65\text{years}} 1.50$ , 95%CI: 1.25-1.80). None of the other known risk factors for CKD (use of NSAIDs, hypertension, and prior AKI) were clearly associated with development of CKD in connection to SGA exposure (see table 3). The absolute risk of CKD in this population was 3.4% for individuals <65 years, 16% for individuals  $\geq 65$  years. For individuals with prior AKI the absolute risk was 40.8% versus 4.6% for individuals without prior AKI.

< table 3 around here >

### *Specific SGAs:*

All SGAs, except for aripiprazole, were associated with increased risk of CKD (see figure 2). The risk was most pronounced for clozapine ( $aOR 1.81$ , 95%CI: 1.22-2.69)



1  
2  
3  
4 followed by olanzapine (aOR 1.41, 95%CI: 1.19-1.65) and quetiapine (aOR 1.28,  
5 95%CI: 1.17-1.42).  
6  
7

8 < figure 2 around here >  
9

10 *Supplementary and sensitivity analyses:*

11 Additional analysis of the association between cumulative dose of SGAs and the risk  
12 of CKD, yielded a somewhat uniform dose-response relationship, with risk of CKD  
13 increasing slightly with increasing cumulative dose of SGA until approximately 900-  
14 1000mg olanzapine equivalents (appendix 3).  
15

16 The risk of CKD in relation SGA exposure was largely unchanged, when including  
17 controls who were not required normal eGFR measurements in the year following  
18 their assigned index date (appendix 4).  
19  
20  
21  
22  
23  
24  
25  
26  
27  
28  
29  
30  
31  
32  
33  
34  
35  
36  
37  
38  
39  
40  
41  
42  
43  
44  
45  
46  
47  
48  
49  
50  
51  
52  
53  
54  
55  
56  
57  
58  
59  
60

## DISCUSSION

In this large population-based study using routinely collected eGFR to define CKD, we found that ever-users of SGAs had a higher risk of developing CKD compared to never-users. However, there was no clear evidence of a dose-response-relationship, and several known risk factors for CKD did not substantially increase the risk of developing CKD (e.g. NSAID use, prior lithium use, prior AKI<sup>8</sup>). We found a further increased risk of developing CKD among individuals with diabetes, and among those below 65 years of age at the time of CKD-diagnosis, although the risk among diabetics was not significant. For individual antipsychotics, the use of clozapine or olanzapine was associated with the highest risk of developing.

Regarding the overall risk of developing CKD in connection to treatment with SGAs, our main findings are in line with previous studies: Tzeng and colleagues<sup>6</sup> found a similar increased risk of CKD among individuals with schizophrenia during three years of follow-up. (HR 1.36, 95%CI: 1.13-1.63), and Wang and colleagues substantiated this finding by observing an increased risk of CKD among individuals with more than 90 and 1000 days of SGA exposure (OR 1.42 and 1.30 respectively)<sup>7</sup>.

In our current study we observed a 52% increased risk of developing CKD for antipsychotic-users who also had diabetes compared to non-diabetics, although not statistically significant. Development of CKD and later potentially end-stage renal disease (ESRD) is a well-established complication of diabetes<sup>25</sup>, and our finding might underscore the importance of regular monitoring of kidney-function in this population. CKD-prevalence is related to age, as nephron-loss and the prevalence of medical conditions generally increases with age<sup>8</sup>. Our finding of the highest risk among the younger age group (table 3) might be explained by the low absolute risk observed in this age group, resulting in greater increases in relative risk, when exposed to SGAs. Another potential explanation for this finding might be a higher proportion of long-term antipsychotic use for severe mental illness in this age category, whereas antipsychotic use in the older age category might represent short-term and/or low-dose use in conditions as dementia and delirium. Furthermore, the observed increase in risk associated with use of few prescriptions is suggestive of some degree of residual confounding. Analysis of the individual SGAs in connection to CKD (see figure 2) found the highest risk associated with olanzapine and clozapine, which was expected as these SGAs are associated with the highest risk of metabolic disturbances and diabetes<sup>2</sup>.

The primary strength of the present study is the improved outcome definition. By using creatinine levels to estimate glomerular filtration, we can include CKD-cases who are not treated at hospitals and specialized nephrology departments. A considerable proportion of CKD-cases might be handled in general practice until severe or ESRD is present. These cases would be missed if our outcome definition only relied on hospital diagnoses. Secondly, the linkage to Danish registers allowed us to obtain high quality information on comorbidity and prescriptions. Lastly, the population of Funen is considered representative for the general Danish population<sup>18</sup>.

1  
2  
3  
4 However, several limitations must be acknowledged: Firstly, the number of  
5 antipsychotic users among CKD-cases was generally low, and most users had very  
6 short duration of antipsychotic use (i.e.  $\leq 2$  prescriptions). Our population included  
7 few users with high cumulative doses (i.e.  $>3650$  mg olanzapine-equivalents). This  
8 means that our dose-response analysis is likely to underestimate the associated risk  
9 among this sub-population with high cumulative doses. The population also includes  
10 very few users of SGAs with low risk of metabolic disturbances, such as aripiprazole,  
11 which makes us unable to conclude if this group is associated with increased risk of  
12 CKD or not. Secondly, we were not able to adjust for use of other potentially  
13 nephrotoxic drugs<sup>26</sup> (besides lithium and NSAIDs), as these are primarily used in  
14 hospitals (i.e., aminoglycosides, chemotherapy, or x-ray contrast) or dispensed from  
15 out-patient clinics (i.e., antiretrovirals, or calcineurin-inhibitors), and thus not  
16 captured in our data sources. Thirdly, information on general risk factors for disease  
17 as overweight, smoking and lifestyle are not included in our data sources.  
18  
19  
20

21 Our finding of modest increases in risk of CKD with SGAs, does not suggest any  
22 clear association between these. Furthermore, the presence of an increased risk  
23 with few antipsychotic prescriptions is indicative of some degree of residual  
24 confounding. Therefore, we do not believe that SGAs by themselves increases the  
25 risk of CKD, but rather contribute to metabolic disturbances which in the end result in  
26 kidney damage. The increased risk among SGA users with diabetes adds to this  
27 interpretation. This underscores the importance of frequent monitoring of metabolic  
28 status in patients treated with antipsychotics, which could include monitoring of  
29 kidney function as standard practice.  
30  
31  
32

33 In conclusion, we found a small-to-moderately increased risk of incident CKD among  
34 individuals using second-generation antipsychotics. All investigated second-  
35 generation antipsychotics, except for aripiprazole, were associated with an increased  
36 risk of CKD.  
37  
38

39 **Acknowledgements:** None

40 **Author contributions:** LCL, JLEH, MH and DPH initiated and designed the study.  
41 LCL analysed the data. MH and DPH drafted the manuscript. All authors critically  
42 revised the manuscript and approved the submission.

43 **Funding:** This study was partially supported by two grants: one from the Beckett  
44 foundation (Copenhagen, Denmark) and from Hede-Nielsen family foundation  
45 (Horsens, Denmark). The founders had no role in designing the study or deciding to  
46 submit the manuscript.  
47

48 **Competing interests:** The authors declare no competing interests.

49 **Patient consent:** Not required

50 **Data sharing statement:** No additional data available.  
51  
52  
53  
54  
55  
56  
57  
58  
59  
60

## References

1. Marston L, Nazareth I, Petersen I, Walters K, Osborn DPJ. Prescribing of antipsychotics in UK primary care: a cohort study. *BMJ Open*. 2014;4(12):e006135. doi:10.1136/bmjopen-2014-006135
2. Correll CU, Detraux J, De Lepeleire J, De Hert M. Effects of antipsychotics, antidepressants and mood stabilizers on risk for physical diseases in people with schizophrenia, depression and bipolar disorder. *World Psychiatry*. 2015;14(2):119-136. doi:10.1002/wps.20204
3. De Hert M, Detraux J, van Winkel R, Yu W, Correll CU. Metabolic and cardiovascular adverse effects associated with antipsychotic drugs. *Nat Rev Endocrinol*. 2011;8(2):114-126. doi:10.1038/nrendo.2011.156
4. Hwang YJ, Dixon SN, Reiss JP, et al. Atypical antipsychotic drugs and the risk for acute kidney injury and other adverse outcomes in older adults: a population-based cohort study. *Ann Intern Med*. 2014;161(4):242-248. doi:10.7326/M13-2796
5. Jiang Y, McCombs JS, Park SH. A Retrospective Cohort Study of Acute Kidney Injury Risk Associated with Antipsychotics. *CNS Drugs*. 2017;31(4):319-326. doi:10.1007/s40263-017-0421-4
6. Tzeng N-S, Hsu Y-H, Ho S-Y, et al. Is schizophrenia associated with an increased risk of chronic kidney disease? A nationwide matched-cohort study. *BMJ Open*. 2015;5(1):e006777-e006777. doi:10.1136/bmjopen-2014-006777
7. Wang H-Y, Huang CL-C, Feng IJ, Tsuang H-C. Second-generation antipsychotic medications and risk of chronic kidney disease in schizophrenia: population-based nested case-control study. *BMJ Open*. 2018;8(5):e019868. doi:10.1136/bmjopen-2017-019868
8. Romagnani P, Remuzzi G, Glassock R, et al. Chronic kidney disease. *Nat Rev Dis Primer*. 2017;3(1). doi:10.1038/nrdp.2017.88
9. McLoughlin C, Cooney C, Mullaney R. Clozapine-induced interstitial nephritis in a patient with schizoaffective disorder in the forensic setting: a case report and review of the literature. *Ir J Psychol Med*. Published online June 21, 2019:1-6. doi:10.1017/ipm.2019.24
10. He L, Peng Y, Fu X, Chen X, Liu H. Dibenzodiazepine Derivative Quetiapine- and Olanzapine-Induced Chronic Interstitial Nephritis. *Ren Fail*. 2013;35(5):657-659. doi:10.3109/0886022X.2013.780615
11. de Jager DJ, Grootendorst DC, Jager KJ, et al. Cardiovascular and noncardiovascular mortality among patients starting dialysis. *JAMA*. 2009;302(16):1782-1789. doi:10.1001/jama.2009.1488
12. Henriksen DP, Damkier P, Hallas J, Nybo M. Sixteen years of creatinine measurements among 460 000 individuals-The Funen Laboratory Cohort

- (FLaC), a population-based pharmacoepidemiological resource to study drug-induced kidney disease. *Basic Clin Pharmacol Toxicol*. 2019;124(5):582-590. doi:10.1111/bcpt.13167
13. Pedersen CB. The Danish Civil Registration System. *Scand J Public Health*. 2011;39(7 Suppl):22-25. doi:10.1177/1403494810387965
  14. Schmidt M, Pedersen L, Sørensen HT. The Danish Civil Registration System as a tool in epidemiology. *Eur J Epidemiol*. 2014;29(8):541-549. doi:10.1007/s10654-014-9930-3
  15. Schmidt M, Schmidt SAJ, Sandegaard JL, Ehrenstein V, Pedersen L, Sørensen HT. The Danish National Patient Registry: a review of content, data quality, and research potential. *Clin Epidemiol*. 2015;7:449-490. doi:10.2147/CLEP.S91125
  16. Jensen VM, Rasmussen AW. Danish education registers. *Scand J Public Health*. 2011;39(7\_suppl):91-94. doi:10.1177/1403494810394715
  17. Pottegård A, Schmidt SAJ, Wallach-Kildemoes H, Sørensen HT, Hallas J, Schmidt M. Data Resource Profile: The Danish National Prescription Registry. *Int J Epidemiol*. 2017;46(3):798-798f. doi:10.1093/ije/dyw213
  18. Henriksen DP, Rasmussen L, Hansen MR, Hallas J, Pottegård A. Comparison of the Five Danish Regions Regarding Demographic Characteristics, Healthcare Utilization, and Medication Use--A Descriptive Cross-Sectional Study. *PloS One*. 2015;10(10):e0140197. doi:10.1371/journal.pone.0140197
  19. KDIGO 2012 Clinical Practice Guideline for the Evaluation and Management of Chronic Kidney Disease. *KDIGO 2012 Clin Pract Guidel Eval Manag Chronic Kidney Dis*. 2013;3(1):1-150. doi:10.1038/kisup.2012.77
  20. Stevens LA, Schmid CH, Greene T, et al. Comparative Performance of the CKD Epidemiology Collaboration (CKD-EPI) and the Modification of Diet in Renal Disease (MDRD) Study Equations for Estimating GFR Levels Above 60 mL/min/1.73 m<sup>2</sup>. *Am J Kidney Dis Off J Natl Kidney Found*. 2010;56(3):486-495. doi:10.1053/j.ajkd.2010.03.026
  21. Kessing LV, Gerds TA, Feldt-Rasmussen B, Andersen PK, Licht RW. Use of Lithium and Anticonvulsants and the Rate of Chronic Kidney Disease: A Nationwide Population-Based Study. *JAMA Psychiatry*. 2015;72(12):1182-1191. doi:10.1001/jamapsychiatry.2015.1834
  22. WHOCC - ATC/DDD Index. Accessed April 29, 2019. [https://www.whocc.no/atc\\_ddd\\_index/](https://www.whocc.no/atc_ddd_index/)
  23. Leucht S, Samara M, Heres S, Davis JM. Dose Equivalents for Antipsychotic Drugs: The DDD Method. *Schizophr Bull*. 2016;42 Suppl 1:S90-94. doi:10.1093/schbul/sbv167

- 1  
2  
3  
4 24. Thygesen LC, Daasnes C, Thaulow I, Brønnum-Hansen H. Introduction to  
5 Danish (nationwide) registers on health and social issues: structure, access,  
6 legislation, and archiving. *Scand J Public Health*. 2011;39(7 Suppl):12-16.  
7 doi:10.1177/1403494811399956  
8  
9  
10 25. Anders H-J, Huber TB, Isermann B, Schiffer M. CKD in diabetes: diabetic  
11 kidney disease versus nondiabetic kidney disease. *Nat Rev Nephrol*.  
12 2018;14(6):361-377. doi:10.1038/s41581-018-0001-y  
13  
14 26. Awdishu L, Mehta RL. The 6R's of drug induced nephrotoxicity. *BMC Nephrol*.  
15 2017;18(1):124. doi:10.1186/s12882-017-0536-3  
16  
17  
18  
19  
20  
21  
22  
23  
24  
25  
26  
27  
28  
29  
30  
31  
32  
33  
34  
35  
36  
37  
38  
39  
40  
41  
42  
43  
44  
45  
46  
47  
48  
49  
50  
51  
52  
53  
54  
55  
56  
57  
58  
59  
60

**LEGENDS TO FIGURES**

Figure 1: Graphical representation of time periods, case definition, control selection and covariate assessment

Figure 2: Association between exposure to second-generation antipsychotics and the risk of chronic kidney disease by individual drugs (aOR: Adjusted odds ratio)

For peer review only



**Table 1: Characteristics of cases and controls**

| Characteristic                          | Cases, N (%) | Controls, N (%) |
|-----------------------------------------|--------------|-----------------|
| All                                     | 21,434       | 85,576          |
| <i>Demographics</i>                     |              |                 |
| Male sex (%)                            | 10,277 (48)  | 41,010 (48)     |
| Age, median [IQR]                       | 71 [64, 78]  | 71 [64, 78]     |
| History of mental disorders             |              |                 |
| Any psychiatric disease (%)             | 1,549 (7)    | 4,828 (6)       |
| Schizophrenia (%)                       | 74 (<1)      | 217 (<1)        |
| Bipolar disease (%)                     | 120 (1)      | 356 (<1)        |
| Moderate to severe depression (%)       | 549 (3)      | 1,742 (2)       |
| Dementia (%)                            | 122 (1)      | 366 (<1)        |
| Other co-morbidities                    |              |                 |
| Acute kidney injury (%)                 | 2,436 (11)   | 2,477 (3)       |
| Diabetes (%)                            | 3,057 (14)   | 8,138 (10)      |
| Hypertension (%)                        | 13,962 (65)  | 47,095 (55)     |
| Antipsychotic exposure                  |              |                 |
| Second-generation antipsychotics (%)    | 557 (3)      | 1,731 (2)       |
| Quetiapine (%)                          | 173 (1)      | 504 (1)         |
| Aripiprazole (%)                        | 8 (<1)       | 41 (<1)         |
| Risperidone (%)                         | 299 (1)      | 967 (1)         |
| Olanzapine (%)                          | 220 (1)      | 593 (1)         |
| Clozapine (%)                           | 37 (<1)      | 82 (<1)         |
| Exposure to other medications           |              |                 |
| Prior use of lithium (%)                | 210 (1)      | 563 (1)         |
| Recent use of NSAIDs (%)                | 5,610 (26)   | 20,081 (23)     |
| Highest achieved level of education (%) |              |                 |
| Level 1                                 | 10,250 (48)  | 38,385 (45)     |
| Level 2                                 | 6,785 (32)   | 27,778 (32)     |
| Level 3                                 | 2,687 (13)   | 12,727 (15)     |
| Unknown                                 | 1,712 (8)    | 6,686 (8)       |



**Table 2: Odds ratios (OR) for chronic kidney disease with use of second-generation antipsychotics**

| Exposure                        | Cases, N (%)<br>(N = 21434) | Controls, N (%)<br>(N = 85576) | Crude OR (95% CI) | Adjusted OR (95% CI) |
|---------------------------------|-----------------------------|--------------------------------|-------------------|----------------------|
| Never use                       | 20877                       | 83845                          | 1 (ref)           | 1 (ref)              |
| Ever use                        | 557                         | 1731                           | 1.29 (1.17-1.42)  | 1.24 (1.12-1.37)     |
| Current use                     | 399                         | 1206                           | 1.32 (1.18-1.49)  | 1.26 (1.12-1.42)     |
| Cumulative use (olanzapine eq.) |                             |                                |                   |                      |
| 0-899mg                         | 380                         | 1246                           | 1.22 (1.09-1.37)  | 1.17 (1.04-1.32)     |
| 900-1799mg                      | 52                          | 124                            | 1.70 (1.23-2.36)  | 1.60 (1.15-2.23)     |
| 1800-3649mg                     | 29                          | 121                            | 0.96 (0.64-1.43)  | 0.91 (0.60-1.38)     |
| >3650mg                         | 96                          | 240                            | 1.60 (1.26-2.03)  | 1.46 (1.14-1.86)     |
| Number of prescriptions         |                             |                                |                   |                      |
| 1-2                             | 144                         | 450                            | 1.28 (1.06-1.54)  | 1.22 (1.01-1.48)     |
| 3-4                             | 76                          | 236                            | 1.28 (0.98-1.66)  | 1.24 (0.95-1.62)     |
| 5-10                            | 68                          | 240                            | 1.14 (0.87-1.50)  | 1.06 (0.80-1.39)     |
| 11-30                           | 115                         | 409                            | 1.12 (0.91-1.38)  | 1.10 (0.89-1.36)     |
| >30                             | 154                         | 396                            | 1.57 (1.30-1.89)  | 1.45 (1.19-1.76)     |

**Table 3: Association between exposure to second-generation antipsychotics and the risk of chronic kidney disease by subgroups (risk of metabolic disturbances, recent use of NSAIDs, pre-existing diabetes, hypertension, prior acute kidney injury (AKI), and age)**

| Exposure     |               | Cases, N  | Controls, N | Crude OR (95% CI) | Adjusted OR (95% CI) |
|--------------|---------------|-----------|-------------|-------------------|----------------------|
| All          |               | N = 21434 | N = 85576   |                   |                      |
| SGA          | Low risk      | 8         | 41          | 0.85 (0.39-1.82)  | 0.71 (0.32-1.54)     |
|              | Mild risk     | 298       | 947         | 1.26 (1.10-1.44)  | 1.21 (1.06-1.39)     |
|              | Moderate risk | 118       | 372         | 1.28 (1.04-1.58)  | 1.19 (0.96-1.48)     |
|              | High risk     | 133       | 371         | 1.43 (1.17-1.74)  | 1.36 (1.11-1.68)     |
| NSAID        | No            | 15824     | 947         | 1.29 (1.15-1.45)  | 1.22 (1.08-1.38)     |
|              | Yes           | 5610      | 20081       | 1.13 (0.84-1.51)  | 1.10 (0.81-1.49)     |
| Diabetes     | No            | 18377     | 77438       | 1.27 (1.14-1.41)  | 1.24 (1.11-1.39)     |
|              | Yes           | 3057      | 8138        | 1.56 (0.96-2.53)  | 1.52 (0.90-2.54)     |
| Hypertension | No            | 7472      | 38481       | 1.43 (1.19-1.72)  | 1.33 (1.10-1.60)     |
|              | Yes           | 13962     | 47095       | 1.21 (1.05-1.39)  | 1.14 (0.98-1.32)     |
| Prior AKI    | No            | 18998     | 83099       | 1.31 (1.18-1.47)  | 1.27 (1.14-1.42)     |
|              | Yes           | 2436      | 2477        | 1.24 (0.59-2.58)  | 0.96 (0.45-2.07)     |
| Age group    | <65           | 5847      | 23423       | 1.66 (1.40-1.97)  | 1.50 (1.25-1.80)     |
|              | 65+           | 15587     | 62153       | 1.15 (1.02-1.30)  | 1.13 (1.00-1.28)     |

BMJ Open  
Index date  
(Case: eGFR < 60;  
Control: Assigned date)

Eligibility criteria:

Living on Funen on 01-01-2001  
Min. 2 creatinine measurements

Ever use / Dx

Covariates:  
Current use  
Recent use

eGFR < 60

Exclusion:  
Possible CKD  
Age < 18

Control:  
First eGFR  $\geq$  60  
[day 1 ; day 365]

Case:  
All eGFRs < 60  
[day 0; day 90+]

Observation period

1st Creatinine  
after 01-01-2001

Last creatinine

For peer review only - <http://bmjopen.bmj.com/site/about/guidelines.xhtml>

aOR (95%CI)

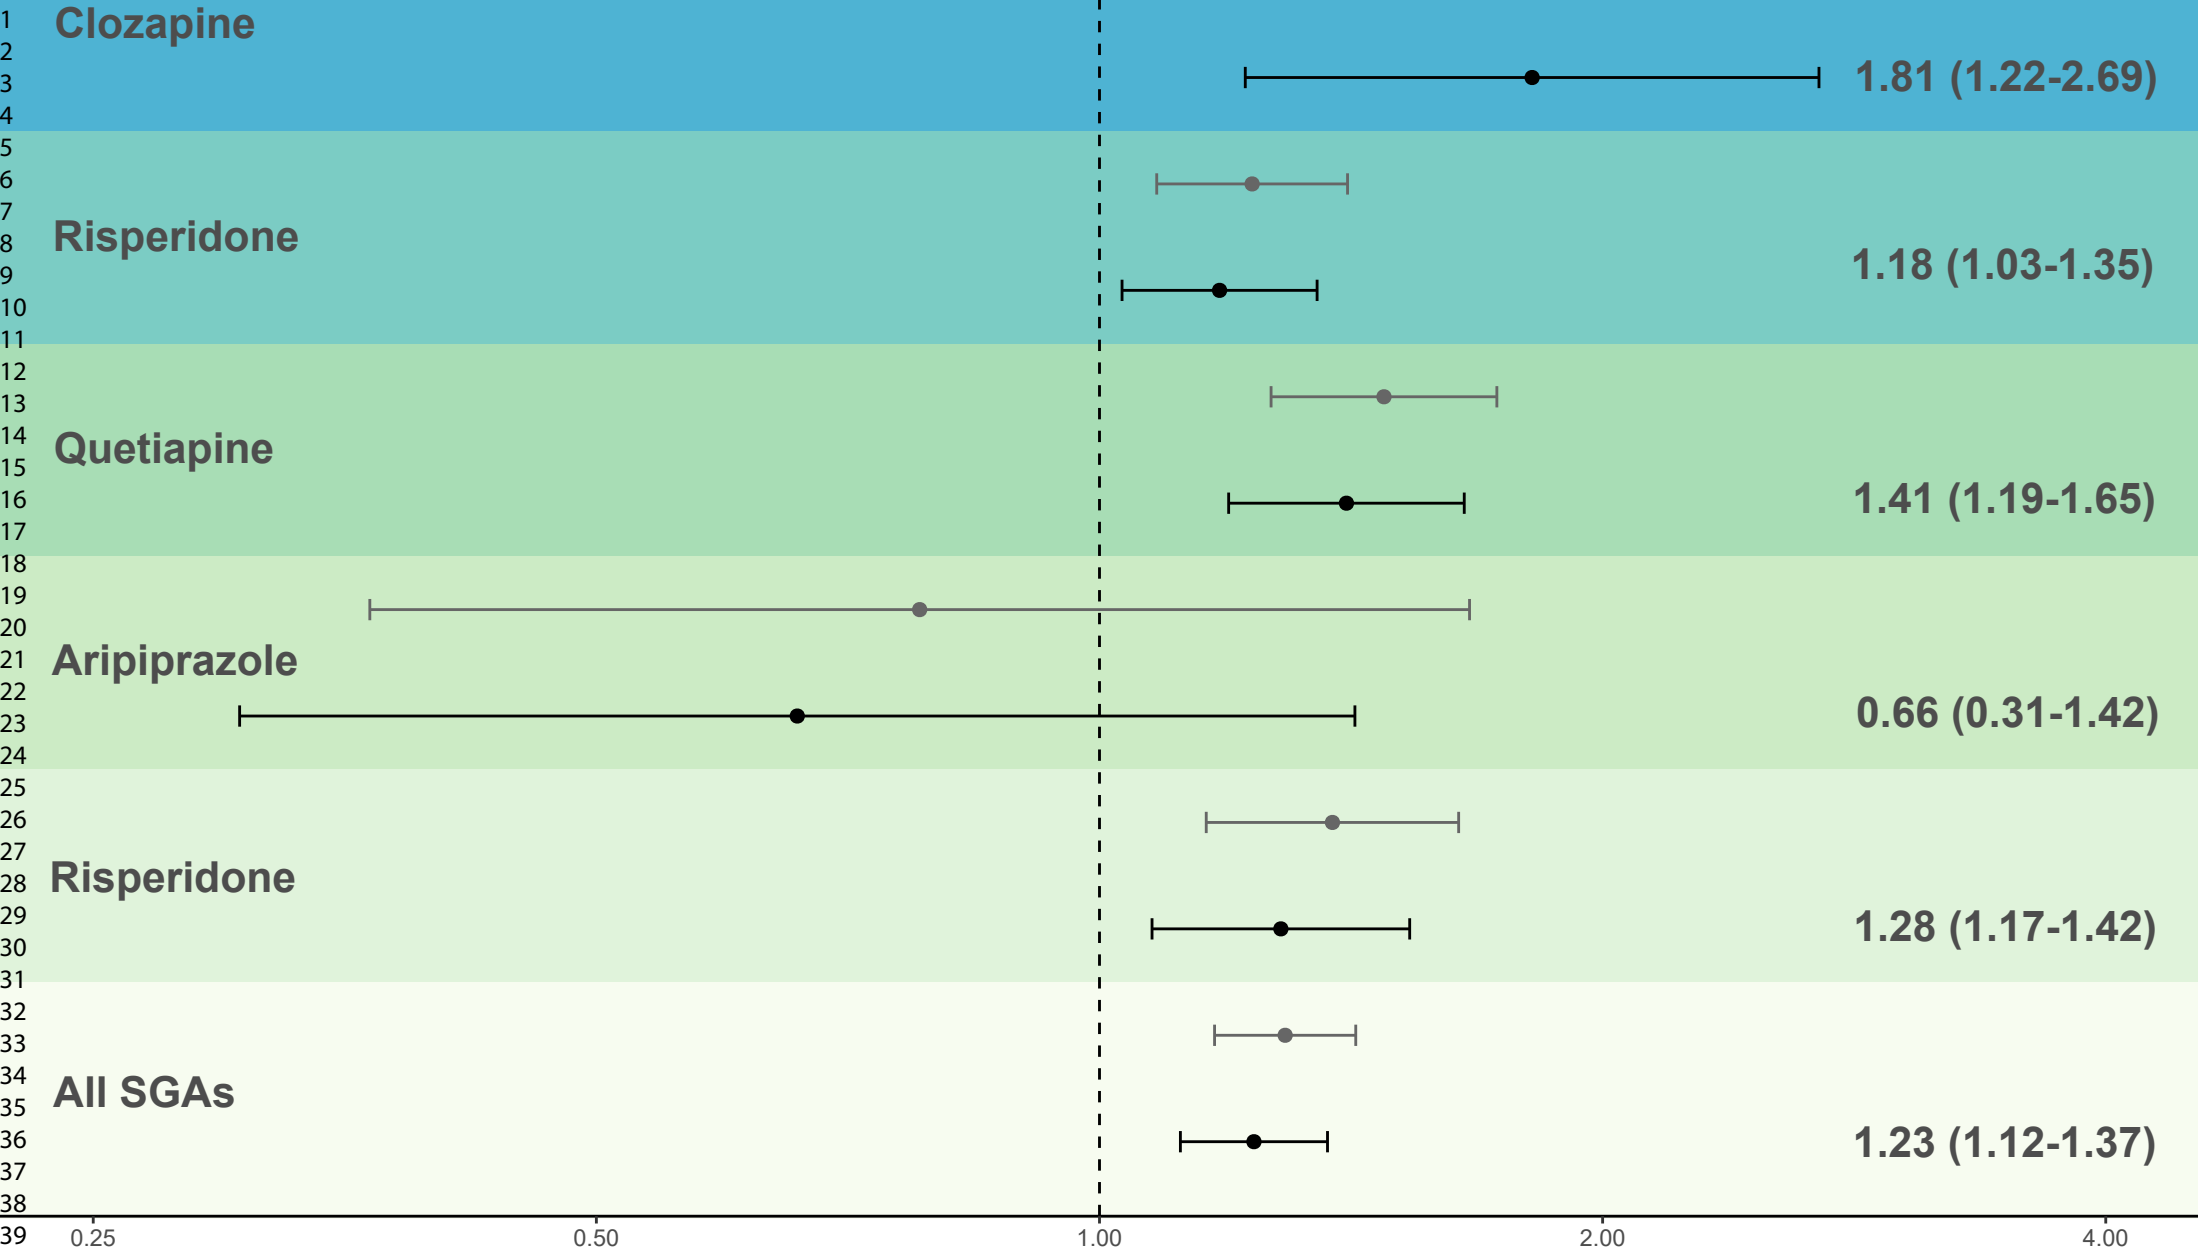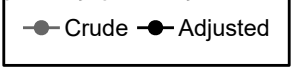

**SUPPLEMENTARY MATERIAL****Second-generation antipsychotics and the Risk of Chronic Kidney Disease: A Population-based Case-Control Study**

Højlund M, Lund LC, Herping JLE, Haastrup MB, Damkier P, Henriksen DP  
2020

## Contents

|                                                                                                                 |   |
|-----------------------------------------------------------------------------------------------------------------|---|
| Appendix 1: Definitions for exposures, outcomes and confounders .....                                           | 2 |
| Appendix 2: Supplementary analysis of association between risk factors, negative control exposure and CKD ..... | 3 |
| Appendix 3: Association between CKD and cumulated dose of SGA modeled using restricted cubic splines .....      | 4 |
| Appendix 4: Sensitivity analysis with modified eligibility criteria for controls.....                           | 5 |
| References .....                                                                                                | 6 |

**Appendix 1: Definitions for exposures, outcomes and confounders**

| <b>Study drugs</b>                             | ATC code                                                                                        | DDD<br>(mg)       | Equivalent to 1mg<br>olanzapine (mg) | Risk of metabolic<br>disturbances (1) |
|------------------------------------------------|-------------------------------------------------------------------------------------------------|-------------------|--------------------------------------|---------------------------------------|
| (Second-generation antipsychotics)             |                                                                                                 |                   |                                      |                                       |
| Aripiprazole                                   | N05AX12                                                                                         | 15                | 1.5                                  | Low                                   |
| Clozapine                                      | N05AH02                                                                                         | 300               | 30                                   | High                                  |
| Olanzapine                                     | N05AH03                                                                                         | 10                | -                                    | High                                  |
| Risperidone                                    | N05AX08                                                                                         | 5                 | 0.5                                  | Mild                                  |
| Quetiapine                                     | N05AH04                                                                                         | 400               | 40                                   | Moderate                              |
| <b>Other medications</b>                       |                                                                                                 |                   |                                      |                                       |
| Non-steroidal anti-inflammatory drugs (NSAIDs) | M01A, excl. M01AX01                                                                             |                   |                                      |                                       |
| Lithium                                        | N05AN01                                                                                         |                   |                                      |                                       |
| <b>Comorbidities</b>                           |                                                                                                 | <b>Definition</b> |                                      |                                       |
| Diabetes                                       | Use of ATC-group A10                                                                            |                   |                                      |                                       |
| Hypertension                                   | Use of ATC-group C03A, C08C, C09A, C09C                                                         |                   |                                      |                                       |
| Possible CKD (2)                               | ICD-10: N00, 01, 03-06, 08.8, 14.1, 14.2, 16.8, 17-19, 25.1, 26-27                              |                   |                                      |                                       |
| Schizophrenia                                  | ICD-10: F20                                                                                     |                   |                                      |                                       |
| Bipolar affective disorder                     | ICD-10: F30-31                                                                                  |                   |                                      |                                       |
| Dementia                                       | ICD-10: F00-03 and G30-31                                                                       |                   |                                      |                                       |
| Prior AKI                                      | Defined using creatinine measurements according to Kidney Disease Improving Global Outcomes (3) |                   |                                      |                                       |

**Appendix 2: Supplementary analysis of association between risk factors, negative control exposure and CKD**

|                                   | Crude OR (95% CI) | Adjusted OR (95% CI) |
|-----------------------------------|-------------------|----------------------|
| <b>Positive control exposures</b> |                   |                      |
| History of diabetes               | 1.59 (1.52-1.67)  | 1.45 (1.38-1.52)     |
| History of hypertension           | 1.56 (1.51-1.61)  | 1.50 (1.45-1.55)     |
| Prior use of lithium              | 1.50 (1.28-1.76)  | 1.60 (1.36-1.87)     |
| Recent use of NSAID               | 1.16 (1.12-1.20)  | 1.14 (1.10-1.18)     |
| <b>Negative control exposure</b>  |                   |                      |
| Use of ocular topical antibiotics | 0.95 (0.90-1.00)  | 0.93 (0.88-0.98)     |

**Appendix 3: Association between CKD and cumulated dose of SGA modeled using restricted cubic splines**

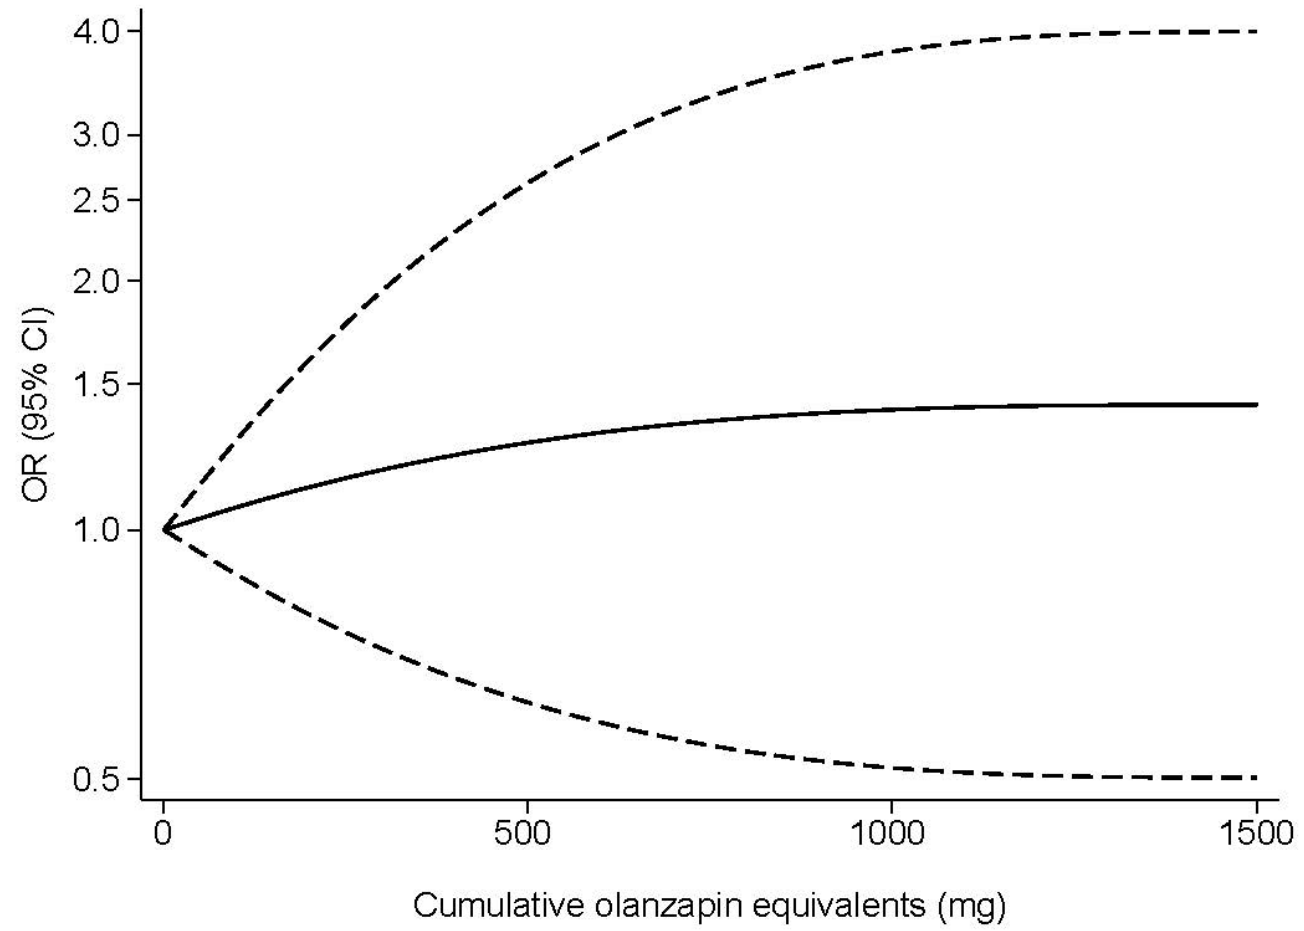

1  
2  
3  
4  
5  
6  
7  
8  
9  
10  
11  
12  
13  
14  
15  
16  
17  
18  
19  
20  
21  
22  
23  
24  
25  
26  
27  
28  
29  
30  
31  
32  
33  
34  
35  
36  
37  
38  
39  
40  
41  
42  
43  
44  
45  
46



#### Appendix 4: Sensitivity analysis with modified eligibility criteria for controls

|                         | Cases<br>(N=21434) | Controls<br>(N=85654) | Crude OR (95% CI) | Adjusted OR (95% CI) |
|-------------------------|--------------------|-----------------------|-------------------|----------------------|
| Ever use                | 557                | 1654                  | 1.36 (1.23-1.49)  | 1.27 (1.14-1.40)     |
| Current use             | 399                | 1153                  | 1.39 (1.24-1.56)  | 1.32 (1.17-1.49)     |
| Cumulative use          |                    |                       |                   |                      |
| 0-899mg                 | 380                | 1223                  | 1.25 (1.12-1.41)  | 1.17 (1.03-1.32)     |
| 900-1799mg              | 52                 | 121                   | 1.71 (1.23-2.36)  | 1.58 (1.13-2.21)     |
| 1800-3649mg             | 29                 | 100                   | 1.18 (0.78-1.78)  | 1.19 (0.78-1.83)     |
| >3650mg                 | 96                 | 210                   | 1.83 (1.44-2.34)  | 1.61 (1.25-2.08)     |
| Number of prescriptions |                    |                       |                   |                      |
| 1-2                     | 144                | 384                   | 1.50 (1.24-1.82)  | 1.38 (1.13-1.69)     |
| 3-4                     | 76                 | 229                   | 1.31 (1.01-1.70)  | 1.21 (0.93-1.59)     |
| 5-10                    | 68                 | 228                   | 1.19 (0.91-1.56)  | 1.09 (0.83-1.45)     |
| 11-30                   | 115                | 444                   | 1.05 (0.85-1.29)  | 0.99 (0.80-1.22)     |
| >30                     | 154                | 369                   | 1.69 (1.40-2.05)  | 1.55 (1.27-1.88)     |

**References**

1. De Hert M, Detraux J, van Winkel R, Yu W, Correll CU. Metabolic and cardiovascular adverse effects associated with antipsychotic drugs. *Nat Rev Endocrinol*. 2011;8:114–26.
2. Kessing LV, Gerds TA, Feldt-Rasmussen B, Andersen PK, Licht RW. Use of Lithium and Anticonvulsants and the Rate of Chronic Kidney Disease: A Nationwide Population-Based Study. *JAMA Psychiatry*. 2015;72:1182–91.
3. KDIGO 2012 Clinical Practice Guideline for the Evaluation and Management of Chronic Kidney Disease. *KDIGO 2012 Clin Pract Guidel Eval Manag Chronic Kidney Dis*. 2013;3:1–150.

For peer review only

**STROBE 2007 (v4) Statement—Checklist of items that should be included in reports of *case-control studies***

| Section/Topic                | Item # | Recommendation                                                                                                                                                                       | Reported on page # |
|------------------------------|--------|--------------------------------------------------------------------------------------------------------------------------------------------------------------------------------------|--------------------|
| <b>Title and abstract</b>    | 1      | (a) Indicate the study's design with a commonly used term in the title or the abstract                                                                                               | 1                  |
|                              |        | (b) Provide in the abstract an informative and balanced summary of what was done and what was found                                                                                  | 2                  |
| <b>Introduction</b>          |        |                                                                                                                                                                                      |                    |
| Background/rationale         | 2      | Explain the scientific background and rationale for the investigation being reported                                                                                                 | 4                  |
| Objectives                   | 3      | State specific objectives, including any prespecified hypotheses                                                                                                                     | 4                  |
| <b>Methods</b>               |        |                                                                                                                                                                                      |                    |
| Study design                 | 4      | Present key elements of study design early in the paper                                                                                                                              | 5                  |
| Setting                      | 5      | Describe the setting, locations, and relevant dates, including periods of recruitment, exposure, follow-up, and data collection                                                      | 5                  |
| Participants                 | 6      | (a) Give the eligibility criteria, and the sources and methods of case ascertainment and control selection. Give the rationale for the choice of cases and controls                  | 5                  |
|                              |        | (b) For matched studies, give matching criteria and the number of controls per case                                                                                                  | 5                  |
| Variables                    | 7      | Clearly define all outcomes, exposures, predictors, potential confounders, and effect modifiers. Give diagnostic criteria, if applicable                                             | 5-6                |
| Data sources/<br>measurement | 8*     | For each variable of interest, give sources of data and details of methods of assessment (measurement). Describe comparability of assessment methods if there is more than one group | 4-6                |
| Bias                         | 9      | Describe any efforts to address potential sources of bias                                                                                                                            | 6-7                |
| Study size                   | 10     | Explain how the study size was arrived at                                                                                                                                            | 5                  |
| Quantitative variables       | 11     | Explain how quantitative variables were handled in the analyses. If applicable, describe which groupings were chosen and why                                                         | 5-6                |
| Statistical methods          | 12     | (a) Describe all statistical methods, including those used to control for confounding                                                                                                | 6-7                |
|                              |        | (b) Describe any methods used to examine subgroups and interactions                                                                                                                  | 6-7                |
|                              |        | (c) Explain how missing data were addressed                                                                                                                                          | -                  |
|                              |        | (d) If applicable, explain how matching of cases and controls was addressed                                                                                                          | 5                  |
|                              |        | (e) Describe any sensitivity analyses                                                                                                                                                | -                  |
| <b>Results</b>               |        |                                                                                                                                                                                      |                    |

|                          |     |                                                                                                                                                                                                                                                                                                                                                                                                               |                          |
|--------------------------|-----|---------------------------------------------------------------------------------------------------------------------------------------------------------------------------------------------------------------------------------------------------------------------------------------------------------------------------------------------------------------------------------------------------------------|--------------------------|
| Participants             | 13* | (a) Report numbers of individuals at each stage of study—eg numbers potentially eligible, examined for eligibility, confirmed eligible, included in the study, completing follow-up, and analysed<br>(b) Give reasons for non-participation at each stage<br>(c) Consider use of a flow diagram                                                                                                               | 8<br>-<br>-              |
| Descriptive data         | 14* | (a) Give characteristics of study participants (eg demographic, clinical, social) and information on exposures and potential confounders<br>(b) Indicate number of participants with missing data for each variable of interest                                                                                                                                                                               | 8, table 1<br>-          |
| Outcome data             | 15* | Report numbers in each exposure category, or summary measures of exposure                                                                                                                                                                                                                                                                                                                                     | 8                        |
| Main results             | 16  | (a) Give unadjusted estimates and, if applicable, confounder-adjusted estimates and their precision (eg, 95% confidence interval). Make clear which confounders were adjusted for and why they were included<br>(b) Report category boundaries when continuous variables were categorized<br>(c) If relevant, consider translating estimates of relative risk into absolute risk for a meaningful time period | 8-9, table 2+3<br>-<br>- |
| Other analyses           | 17  | Report other analyses done—eg analyses of subgroups and interactions, and sensitivity analyses                                                                                                                                                                                                                                                                                                                | 8-9, table 2+3           |
| <b>Discussion</b>        |     |                                                                                                                                                                                                                                                                                                                                                                                                               |                          |
| Key results              | 18  | Summarise key results with reference to study objectives                                                                                                                                                                                                                                                                                                                                                      | 10                       |
| Limitations              | 19  | Discuss limitations of the study, taking into account sources of potential bias or imprecision.<br>Discuss both direction and magnitude of any potential bias                                                                                                                                                                                                                                                 | 11                       |
| Interpretation           | 20  | Give a cautious overall interpretation of results considering objectives, limitations, multiplicity of analyses, results from similar studies, and other relevant evidence                                                                                                                                                                                                                                    | 10-11                    |
| Generalisability         | 21  | Discuss the generalisability (external validity) of the study results                                                                                                                                                                                                                                                                                                                                         | 11                       |
| <b>Other information</b> |     |                                                                                                                                                                                                                                                                                                                                                                                                               |                          |
| Funding                  | 22  | Give the source of funding and the role of the funders for the present study and, if applicable, for the original study on which the present article is based                                                                                                                                                                                                                                                 | 11                       |

\*Give information separately for cases and controls in case-control studies and, if applicable, for exposed and unexposed groups in cohort and cross-sectional studies.

**Note:** An Explanation and Elaboration article discusses each checklist item and gives methodological background and published examples of transparent reporting. The STROBE checklist is best used in conjunction with this article (freely available on the Web sites of PLoS Medicine at <http://www.plosmedicine.org/>, Annals of Internal Medicine at <http://www.annals.org/>, and Epidemiology at <http://www.epidem.com/>). Information on the STROBE Initiative is available at [www.strobe-statement.org](http://www.strobe-statement.org).

# BMJ Open

## Second-generation antipsychotics and the risk of chronic kidney disease: a population-based case-control study

|                                 |                                                                                                                                                                                                                                                                                                                                                                                                                                                                                                                                                                                                                                                                                                                                                                                                                                                        |
|---------------------------------|--------------------------------------------------------------------------------------------------------------------------------------------------------------------------------------------------------------------------------------------------------------------------------------------------------------------------------------------------------------------------------------------------------------------------------------------------------------------------------------------------------------------------------------------------------------------------------------------------------------------------------------------------------------------------------------------------------------------------------------------------------------------------------------------------------------------------------------------------------|
| Journal:                        | <i>BMJ Open</i>                                                                                                                                                                                                                                                                                                                                                                                                                                                                                                                                                                                                                                                                                                                                                                                                                                        |
| Manuscript ID                   | bmjopen-2020-038247.R2                                                                                                                                                                                                                                                                                                                                                                                                                                                                                                                                                                                                                                                                                                                                                                                                                                 |
| Article Type:                   | Original research                                                                                                                                                                                                                                                                                                                                                                                                                                                                                                                                                                                                                                                                                                                                                                                                                                      |
| Date Submitted by the Author:   | 04-Jul-2020                                                                                                                                                                                                                                                                                                                                                                                                                                                                                                                                                                                                                                                                                                                                                                                                                                            |
| Complete List of Authors:       | Højlund, Mikkel; University of Southern Denmark Institute for Public Health, Clinical Pharmacology and Pharmacy; Mental Health Services in the Region of Southern Denmark, Department of Psychiatry Aabenraa<br>Lund, Lars; University of Southern Denmark Institute for Public Health, Clinical Pharmacology and Pharmacy<br>Herping, Jonas; University of Southern Denmark Institute for Public Health, Clinical Pharmacology and Pharmacy<br>Haastrup, Maija; Odense University Hospital, Department of Clinical Biochemistry & Pharmacology<br>Damkier, Per; Odense University Hospital, Department of Clinical Biochemistry & Pharmacology; University of Southern Denmark, Clinical Biochemistry, Department of Clinical Research<br>Henriksen, Daniel Pilsgaard; Odense University Hospital, Department of Clinical Biochemistry & Pharmacology |
| <b>Primary Subject Heading</b>: | Epidemiology                                                                                                                                                                                                                                                                                                                                                                                                                                                                                                                                                                                                                                                                                                                                                                                                                                           |
| Secondary Subject Heading:      | Diabetes and endocrinology, Pharmacology and therapeutics, Renal medicine, Mental health                                                                                                                                                                                                                                                                                                                                                                                                                                                                                                                                                                                                                                                                                                                                                               |
| Keywords:                       | CLINICAL PHARMACOLOGY, EPIDEMIOLOGY, Nephrology < INTERNAL MEDICINE, Chronic renal failure < NEPHROLOGY, PSYCHIATRY                                                                                                                                                                                                                                                                                                                                                                                                                                                                                                                                                                                                                                                                                                                                    |
|                                 |                                                                                                                                                                                                                                                                                                                                                                                                                                                                                                                                                                                                                                                                                                                                                                                                                                                        |

SCHOLARONE™  
Manuscripts



I, the Submitting Author has the right to grant and does grant on behalf of all authors of the Work (as defined in the below author licence), an exclusive licence and/or a non-exclusive licence for contributions from authors who are: i) UK Crown employees; ii) where BMJ has agreed a CC-BY licence shall apply, and/or iii) in accordance with the terms applicable for US Federal Government officers or employees acting as part of their official duties; on a worldwide, perpetual, irrevocable, royalty-free basis to BMJ Publishing Group Ltd ("BMJ") its licensees and where the relevant Journal is co-owned by BMJ to the co-owners of the Journal, to publish the Work in this journal and any other BMJ products and to exploit all rights, as set out in our [licence](#).

The Submitting Author accepts and understands that any supply made under these terms is made by BMJ to the Submitting Author unless you are acting as an employee on behalf of your employer or a postgraduate student of an affiliated institution which is paying any applicable article publishing charge ("APC") for Open Access articles. Where the Submitting Author wishes to make the Work available on an Open Access basis (and intends to pay the relevant APC), the terms of reuse of such Open Access shall be governed by a Creative Commons licence – details of these licences and which [Creative Commons](#) licence will apply to this Work are set out in our licence referred to above.

Other than as permitted in any relevant BMJ Author's Self Archiving Policies, I confirm this Work has not been accepted for publication elsewhere, is not being considered for publication elsewhere and does not duplicate material already published. I confirm all authors consent to publication of this Work and authorise the granting of this licence.

## Second-generation antipsychotics and the Risk of Chronic Kidney Disease: A Population-based Case-Control Study

Mikkel Højlund MD 1,2, Lars C. Lund MD 1, Jonas L. E. Herping MD 1, Maija B. Haastrup MD 3, Per Damkier MD Professor PhD 3,4, Daniel P. Henriksen MD PhD 3

- 1) Clinical Pharmacology and Pharmacy, Department of Public Health, University of Southern Denmark, Odense, Denmark
- 2) Department of Psychiatry Aabenraa, Mental Health Services Region of Southern Denmark, Aabenraa, Denmark
- 3) Department of Clinical Biochemistry & Pharmacology, Odense University Hospital, Odense, Denmark
- 4) Clinical Biochemistry, Department of Clinical Research, University of Southern Denmark, Odense, Denmark

**Word count:** 2716, **Tables:** 3, **Figures:** 2, **References:** 26

### Corresponding author:

Mr. Mikkel Højlund, Department of Public Health, Clinical Pharmacology and Pharmacy, University of Southern Denmark, J.B. Winsløvs Vej 19, 2<sup>nd</sup> floor, DK-5000 Odense, Denmark. Email: [mhoejlund@health.sdu.dk](mailto:mhoejlund@health.sdu.dk), phone: +45 6550 4660.

**Abstract (279/300 words)****Objectives:**

To examine the association between use of second-generation antipsychotics (SGA) and the risk of chronic kidney disease (CKD).

**Design:** Population-based case-control study

**Setting:** Routinely collected laboratory, prescription, and diagnostic information on all inhabitants with creatinine measurements residing on the island of Funen, Denmark (2001-2015).

**Participants:** 21,434 cases with incident CKD matched with 85,576 CKD-free population controls by risk-set sampling using age, sex, and calendar year.

**Primary and secondary outcome measures:**

CKD was defined as an eGFR below 60 ml/min/1.73m<sup>2</sup> in a period longer than three months. Information on drug exposure and comorbidities were obtained from the Danish National Prescription Register and the Danish National Patient Register. We calculated odds ratios (OR) for the association between SGA use and CKD using conditional logistic regression.

**Results:**

Use of SGAs was associated with increased risk of CKD among ever-users (OR 1.24, 95%CI: 1.12-1.37) and current users (OR 1.26, 95%CI: 1.12-1.42). We found no clear evidence of dose-response-relationship. Both short duration (1-2 antipsychotic prescriptions; OR 1.22, 95%CI: 1.01-1.48), as well as long-term use (>30 prescriptions; OR 1.45, 95%CI 1.19-1.76) were associated with an increased risk of CKD. Both use of SGAs with mild and high risk of metabolic disturbances was associated with increased risk of CKD (OR 1.21, 95%CI: 1.06-1.39 and 1.36, 95%CI: 1.11-1.68 respectively). Recent use of NSAIDs, prior use of lithium, hypertension, or prior AKI were not clearly associated with development of CKD in connection to SGA exposure. The highest risk of CKD was found for clozapine (OR 1.81, 95%CI: 1.22-2.69).

**Conclusions:**

Use of SGA is associated with a small-to-moderately increased risk of incident CKD. All investigated second-generation antipsychotics, except for aripiprazole, were associated with an increased risk of CKD.

**Keywords:**

Antipsychotics, chronic kidney disease, case-control study



**Article summary:****Strengths and limitations of this study**

- Improved outcome definition by incorporating creatinine levels to estimate glomerular filtration, which enabled us to include cases of chronic kidney disease who were not treated at hospitals or specialized nephrology departments.
- Inclusion of information on comorbidity and prescriptions with high validity from Danish National Health Registers.
- Population-based design in a population, which are considered representative for the general Danish population.
- Limited number of antipsychotic users among cases, and very few users of second-generation antipsychotics with low risk of metabolic disturbances, such as aripiprazole.
- Information on general risk factors for disease as overweight, smoking and lifestyle were not available.

## INTRODUCTION

Antipsychotics are primarily labelled for maintenance treatment in schizophrenia, bipolar affective disorder, and insufficiently responding unipolar depression, but are also used commonly in a number of other psychiatric conditions<sup>1</sup>. Maintenance treatment in chronic conditions is often year- or life-long, which makes tolerability an important concern in choosing and adhering to treatment. Furthermore, the risk of acute adverse events associated with antipsychotics are relevant to both long-term treatment and to episodic treatment. Second generation antipsychotics (SGA) are associated with a number of adverse effects including weight gain, metabolic syndrome, diabetes, and cardiovascular disease<sup>2,3</sup>. Observational studies have linked SGAs to an increased risk of both acute kidney injury (AKI)<sup>4,5</sup> and chronic kidney disease (CKD)<sup>6,7</sup>.

CKD can develop in several ways: Following AKI, as a complication to metabolic syndrome and diabetes (diabetic nephropathy), or as a complication to cardiovascular disease, either hypertension (hypertensive nephropathy) or arteriosclerosis<sup>8</sup>. Use of SGAs has been associated with all these conditions. For example, case reports have described clozapine, olanzapine, and quetiapine to be associated with interstitial nephritis and AKI<sup>9,10</sup>. Therefore, maintenance treatment with antipsychotics might contribute to the development of CKD, which is important as the mortality of patients with end-stage renal disease is comparable to patients with coronary heart disease<sup>11</sup>.

Prior studies on the association of SGAs and CKD have used hospital discharge diagnoses of CKD as outcome definitions<sup>6,7</sup>. In advanced stages, CKD will result in hospitalization, dialysis, kidney transplantation or death, but less severe stages of CKD are usually handled in primary care, which are not recorded in the administrative registers.

We aimed to investigate the association between use of SGAs and the subsequent risk of CKD by combining prescription information with laboratory data to substantiate the outcome definition.

## METHODS

We undertook a population-based case-control study of incident CKD-cases among inhabitants residing on the island of Funen, Denmark who - between 2001 and 2015 - had at least two measurements of creatinine performed. We compared the use of SGAs among CKD-cases to that of a disease-free control population.

### Data sources

We used information from the Funen Laboratory Cohort (FLaC). A more detailed description of FLaC has been published elsewhere<sup>12</sup>. In summary, FLaC contains information regarding all biochemistry and laboratory results of all Funen inhabitants who, within the study period, had at least one measurement of plasma creatinine performed. A total of 460,365 patients out of 693,843 Funen inhabitants, had their creatinine measured in this period, comprising a total of 7,742,124 creatinine samples. We linked this information to several nationwide Danish administrative registers: Danish Civil Registration System<sup>13,14</sup>, The Danish National Patient Registry<sup>15</sup>, Registers in Statistics Denmark recording education level<sup>16</sup>, and The Danish National Prescription Registry<sup>17</sup>. As the Danish National Health Service provides universal tax-supported healthcare for the entire Danish population, and as all Danish inhabitants are assigned a unique personal 10-digit identified (Central Personal Register (CPR) number) at birth, it is possible to conduct true population-based register-linkage studies covering the entire population<sup>13</sup>.

### Population

All adults with two or more recorded creatinine values and living on Funen and the surrounding islands in the period January 2001 to December 2015 were eligible for inclusion in the study. Funen is a part of the Region of Southern Denmark, and is considered representative for the entire Danish population<sup>18</sup>. For each individual, an observation period was defined, starting at the first creatinine measurement during the study period and ending with the last creatinine measurement. Only individuals with normal kidney function were included. In case of emigration from the island of Funen, the observation period ended on the last date of creatinine measurement prior to emigration.

### Cases

Cases were defined as individuals with incident CKD during the observation period. We defined CKD according to the KDIGO guidelines<sup>19</sup> as the first measurement of eGFR below 60 ml/min/1.73m<sup>2</sup>. The date of this measurement defined the index date. In order to ensure that cases had CKD, the first eGFR measured three months after the index date also had to be below 60 ml/min/1.73m<sup>2</sup>, as well as all the measurements in the in-between period (from the index date to 3 months after). The eGFR was calculated according to the CKD<sub>epi</sub> formula<sup>20</sup>. Individuals with a discharge diagnosis of renal disease according to the definition of possible CKD, as proposed by Kessing et al.<sup>21</sup> prior to the date of biochemical CKD were excluded. (ICD-10: N18-N19.9 inclusive plus N00, N01, N03, N04, N05, N06, N8.8 plus N14.1, N14.2, N16.8, N17, N25.1, N26, and N27). Individuals with any eGFR measurement below 60 ml/min/1,73m<sup>2</sup> up to one year prior to the study start, were also excluded.

### Controls

Four population controls were matched on age, sex, and calendar time to each case and assigned an index date corresponding to the case's date of diagnosis. We used risk-set sampling and excluded controls who fulfilled the same exclusion criteria as described for cases. To ensure that controls had not developed CKD since their last creatinine measurement, all controls were required to have at least one creatinine recorded in the year after the index date. This measurement had to be above or equal to 60 ml/min/1.73m<sup>2</sup>. Cases could be selected as controls before they became cases, and we allowed the study population to be selected as controls more than once. Because of these criteria, the generated odds ratio (OR) is considered an unbiased estimate of the incidence rate ratio. Please refer to figure 1 for a graphical depiction of the study design.

< figure 1 around here >

### Drug exposure

We obtained information on all filled prescriptions of SGAs and used the defined daily dose (DDD), according to the WHO Collaborating Centre for Drug Statistics methodology<sup>22</sup>. We used the DDDs as a surrogate marker of the cumulative exposure but converted them into olanzapine equivalents<sup>23</sup>. For an overview of the ATC codes and the corresponding DDDs, please refer to appendix 1. The DDDs, determined by the WHO, are based on doses in maintenance treatment of schizophrenia. We used the number of filled prescriptions as a surrogate marker of duration of use, as many of the drugs are used off-label in lower doses than for treatment of schizophrenia.

### Covariates

We included the following potential confounders in our analysis: i) Age, sex and calendar time (accounted for by sampling procedure), ii) use of other drugs known to affect renal function (lithium, NSAIDs), iii) history of hypertension and diabetes, and iv) highest achieved level of education as a proxy for socioeconomic status. Use of lithium was defined as any filling of prescriptions for lithium before the index date. Recent use of NSAIDs was defined as filling of prescriptions within one year before the index date. Relevant ICD-10 diagnoses and ATC-codes are listed in appendix 1.

### Statistical analyses

We used conditional logistic regression to estimate odds ratios (OR) with 95% confidence interval (CI) for the association between SGA-use and the risk of CKD. Our primary outcome was risk of CKD in relation to ever use of SGA. Secondary outcomes were risk of CKD in relation to current use, cumulative exposure, and cumulative duration. We computed a crude and adjusted ORs (aOR), where the adjusted model included the following predefined clinically relevant potential confounders: prior use of lithium, recent use of NSAIDs, diabetes, hypertension, and highest achieved level of education. We conducted subgroup analyses by stratifying on metabolic risk of SGA as proposed by De Hert et al.<sup>3</sup>, cumulative dose, individual SGAs, diabetes, hypertension, and prior AKI. To explore a potential dose response relation, we performed a supplementary analysis, using conditional logistic regression amongst all users of SGA and restricted cubic splines with knots placed at the value for the 10<sup>th</sup>, 50<sup>th</sup> and 90<sup>th</sup> percentile for cumulative doses among cases.

1  
2  
3  
4 We conducted a sensitivity analysis where eligible controls were not required to  
5 have normal eGFR measurement(s) in the year following the index date to assess  
6 the potential of selection bias with this criterion. Furthermore, we conducted control  
7 analyses to assess the association between CKD and known risk factors (history of  
8 diabetes or hypertension, and use of lithium or NSAIDs), and between a negative  
9 control exposure and CKD (topical ocular antibiotics – not considered associated  
10 with CKD). R version 3.5.1 (R Core Team, Vienna, Austria) was used for all  
11 analyses.  
12  
13

#### 14 **Patient and public involvement**

15 No patients were involved in designing the study  
16  
17

#### 18 **Approval**

19 This study was approved by the Danish Data Protection Agency (j.nr 2008-58-0034)  
20 and the Danish Patient Safety Authority (j.nr. 3-3013-809/1). According to Danish  
21 law, studies based solely on register data do not require approval from an ethics  
22 review board<sup>24</sup>.  
23  
24  
25  
26  
27  
28  
29  
30  
31  
32  
33  
34  
35  
36  
37  
38  
39  
40  
41  
42  
43  
44  
45  
46  
47  
48  
49  
50  
51  
52  
53  
54  
55  
56  
57  
58  
59  
60

## RESULTS

We identified 21,434 cases with incident CKD in Funen County between 2001 and 2016, with 48% males and a median age of 71 years (IQR 64-78 years). Using risk-set sampling, cases were matched by sex, age, and calendar year to 85,576 CKD-free population controls. Hypertension and diabetes were more prevalent among cases than controls at baseline (65 vs 55% and 14 vs 10% respectively). The most commonly used SGA among cases and controls was risperidone. See table 1 for further details.

< table 1 around here >

### *Main analysis:*

Among cases, 557 (2.6%) were ever-users of SGAs, compared to 1731 (2.0%) of controls yielding an adjusted OR of 1.24 (95%CI: 1.12-1.37). The corresponding adjusted OR for current use was 1.26 (95%CI: 1.12-1.42). Control analyses confirmed that each of the assumed risk factors included in the model was positively associated with increased risk of CKD and that a negative control exposure was not associated with increased risk of CKD (appendix 2). We did not find evidence of a dose-response-relationship, using predefined categories neither in relation to cumulative use nor in relation to duration of use (see table 2). Short duration measured as 1-2 antipsychotic prescriptions, as well as long-term use (>30 prescriptions) were both associated with increased risk (see table 2).

< table 2 around here >

### *Subgroup analysis:*

The majority of cases and controls used SGAs with mild risk of metabolic disturbances (e.g. risperidone), followed by SGAs with high risk (e.g. clozapine and olanzapine), and moderate risk (e.g. quetiapine). Use of SGAs with mild and high risk of metabolic disturbances was associated with increased risk of CKD in the adjusted model (OR<sub>mildrisk</sub> 1.21, 95%CI: 1.06-1.39 and OR<sub>highrisk</sub> 1.36, 95%CI: 1.11-1.68) (see table 3).

Users of SGAs, who also had diabetes, had an 50% increased risk of developing CKD compared to controls, but due to the low number of exposed diabetics, the confidence interval overlapped unity (aOR<sub>diabetes</sub> 1.52, 95%CI: 0.90-2.54). Antipsychotic users in the low age category, had an increased risk of CKD compared to the higher age category (aOR<sub><65years</sub> 1.50, 95%CI: 1.25-1.80). None of the other known risk factors for CKD (use of NSAIDs, hypertension, and prior AKI) were clearly associated with development of CKD in connection to SGA exposure (see table 3). The absolute risk of CKD in this population was 3.4% for individuals <65 years, 16% for individuals ≥65 years. For individuals with prior AKI the absolute risk was 40.8% versus 4.6% for individuals without prior AKI.

< table 3 around here >

### *Specific SGAs:*

1  
2  
3  
4 All SGAs, except for aripiprazole, were associated with increased risk of CKD (see  
5 figure 2). The risk was most pronounced for clozapine (aOR 1.81, 95%CI: 1.22-2.69)  
6 followed by olanzapine (aOR 1.41, 95%CI: 1.19-1.65) and quetiapine (aOR 1.28,  
7 95%CI: 1.17-1.42).  
8

9  
10 < figure 2 around here >  
11

12 *Supplementary and sensitivity analyses:*

13 Additional analysis of the association between cumulative dose of SGAs and the risk  
14 of CKD, yielded a somewhat uniform dose-response relationship, with risk of CKD  
15 increasing slightly with increasing cumulative dose of SGA until approximately 900-  
16 1000mg olanzapine equivalents (appendix 3).  
17

18 The risk of CKD in relation SGA exposure was largely unchanged, when including  
19 controls who were not required normal eGFR measurements in the year following  
20 their assigned index date (appendix 4).  
21  
22  
23  
24  
25  
26  
27  
28  
29  
30  
31  
32  
33  
34  
35  
36  
37  
38  
39  
40  
41  
42  
43  
44  
45  
46  
47  
48  
49  
50  
51  
52  
53  
54  
55  
56  
57  
58  
59  
60



## DISCUSSION

In this large population-based study using routinely collected eGFR to define CKD, we found that ever-users of SGAs had a higher risk of developing CKD compared to never-users. However, there was no clear evidence of a dose-response-relationship, and several known risk factors for CKD did not substantially increase the risk of developing CKD (e.g. NSAID use, prior lithium use, prior AKI<sup>8</sup>). We found a further increased risk of developing CKD among individuals with diabetes, and among those below 65 years of age at the time of CKD-diagnosis, although the risk among diabetics was not significant. For individual antipsychotics, the use of clozapine or olanzapine was associated with the highest risk of developing.

Regarding the overall risk of developing CKD in connection to treatment with SGAs, our main findings are in line with previous studies: Tzeng and colleagues<sup>6</sup> found a similar increased risk of CKD among individuals with schizophrenia during three years of follow-up. (HR 1.36, 95%CI: 1.13-1.63), and Wang and colleagues substantiated this finding by observing an increased risk of CKD among individuals with more than 90 and 1000 days of SGA exposure (OR 1.42 and 1.30 respectively)<sup>7</sup>.

In our current study we observed a 52% increased risk of developing CKD for antipsychotic-users who also had diabetes compared to non-diabetics, although not statistically significant. Development of CKD and later potentially end-stage renal disease (ESRD) is a well-established complication of diabetes<sup>25</sup>, and our finding might underscore the importance of regular monitoring of kidney-function in this population. CKD-prevalence is related to age, as nephron-loss and the prevalence of medical conditions generally increases with age<sup>8</sup>. Our finding of the highest risk among the younger age group (table 3) might be explained by the low absolute risk observed in this age group, resulting in greater increases in relative risk, when exposed to SGAs. Another potential explanation for this finding might be a higher proportion of long-term antipsychotic use for severe mental illness in this age category, whereas antipsychotic use in the older age category might represent short-term and/or low-dose use in conditions as dementia and delirium. Furthermore, the observed increase in risk associated with use of few prescriptions is suggestive of some degree of residual confounding. Analysis of the individual SGAs in connection to CKD (see figure 2) found the highest risk associated with olanzapine and clozapine, which was expected as these SGAs are associated with the highest risk of metabolic disturbances and diabetes<sup>2</sup>.

The primary strength of the present study is the improved outcome definition. By using creatinine levels to estimate glomerular filtration, we can include CKD-cases who are not treated at hospitals and specialized nephrology departments. A considerable proportion of CKD-cases might be handled in general practice until severe or ESRD is present. These cases would be missed if our outcome definition only relied on hospital diagnoses. Secondly, the linkage to Danish registers allowed us to obtain high quality information on comorbidity and prescriptions. Lastly, the population of Funen is considered representative for the general Danish population<sup>18</sup>.



1  
2  
3  
4 However, several limitations must be acknowledged: Firstly, the number of  
5 antipsychotic users among CKD-cases was generally low, and most users had very  
6 short duration of antipsychotic use (i.e.  $\leq 2$  prescriptions). Our population included  
7 few users with high cumulative doses (i.e.  $>3650$  mg olanzapine-equivalents). This  
8 means that our dose-response analysis is likely to underestimate the associated risk  
9 among this sub-population with high cumulative doses. The population also includes  
10 very few users of SGAs with low risk of metabolic disturbances, such as aripiprazole,  
11 which makes us unable to conclude if this group is associated with increased risk of  
12 CKD or not. Secondly, we were not able to adjust for use of other potentially  
13 nephrotoxic drugs<sup>26</sup> (besides lithium and NSAIDs), as these are primarily used in  
14 hospitals (i.e., aminoglycosides, chemotherapy, or x-ray contrast) or dispensed from  
15 out-patient clinics (i.e., antiretrovirals, or calcineurin-inhibitors), and thus not  
16 captured in our data sources. Thirdly, information on general risk factors for disease  
17 as overweight, smoking and lifestyle are not included in our data sources.  
18  
19  
20

21 Our finding of modest increases in risk of CKD with SGAs, does not suggest any  
22 clear association between these. Furthermore, the presence of an increased risk  
23 with few antipsychotic prescriptions is indicative of some degree of residual  
24 confounding. Therefore, we do not believe that SGAs by themselves increases the  
25 risk of CKD, but rather contribute to metabolic disturbances which in the end result in  
26 kidney damage. The increased risk among SGA users with diabetes adds to this  
27 interpretation. This underscores the importance of frequent monitoring of metabolic  
28 status in patients treated with antipsychotics, which could include monitoring of  
29 kidney function as standard practice.  
30  
31  
32

33 In conclusion, we found a small-to-moderately increased risk of incident CKD among  
34 individuals using second-generation antipsychotics. All investigated second-  
35 generation antipsychotics, except for aripiprazole, were associated with an increased  
36 risk of CKD.  
37  
38

39 **Acknowledgements:** None

40 **Author contributions:** MH, LCL, JLEH, PD, and DPH initiated and designed the  
41 study. LCL analysed the data. MH, LCL, MBH, PD, and DPH interpreted the results.  
42 MH, PD, and DPH drafted the manuscript. All authors critically revised the  
43 manuscript and approved the final version for submission.

44 **Funding:** This study was partially supported by two grants: one from the Beckett  
45 foundation (Copenhagen, Denmark) and from Hede-Nielsen family foundation  
46 (Horsens, Denmark). The founders had no role in designing the study or deciding to  
47 submit the manuscript.  
48

49 **Competing interests:** The authors declare no competing interests.

50 **Patient consent:** Not required

51 **Data sharing statement:** No additional data available.  
52  
53  
54  
55  
56  
57  
58  
59  
60

## References

1. Marston L, Nazareth I, Petersen I, Walters K, Osborn DPJ. Prescribing of antipsychotics in UK primary care: a cohort study. *BMJ Open*. 2014;4(12):e006135. doi:10.1136/bmjopen-2014-006135
2. Correll CU, Detraux J, De Lepeleire J, De Hert M. Effects of antipsychotics, antidepressants and mood stabilizers on risk for physical diseases in people with schizophrenia, depression and bipolar disorder. *World Psychiatry*. 2015;14(2):119-136. doi:10.1002/wps.20204
3. De Hert M, Detraux J, van Winkel R, Yu W, Correll CU. Metabolic and cardiovascular adverse effects associated with antipsychotic drugs. *Nat Rev Endocrinol*. 2011;8(2):114-126. doi:10.1038/nrendo.2011.156
4. Hwang YJ, Dixon SN, Reiss JP, et al. Atypical antipsychotic drugs and the risk for acute kidney injury and other adverse outcomes in older adults: a population-based cohort study. *Ann Intern Med*. 2014;161(4):242-248. doi:10.7326/M13-2796
5. Jiang Y, McCombs JS, Park SH. A Retrospective Cohort Study of Acute Kidney Injury Risk Associated with Antipsychotics. *CNS Drugs*. 2017;31(4):319-326. doi:10.1007/s40263-017-0421-4
6. Tzeng N-S, Hsu Y-H, Ho S-Y, et al. Is schizophrenia associated with an increased risk of chronic kidney disease? A nationwide matched-cohort study. *BMJ Open*. 2015;5(1):e006777-e006777. doi:10.1136/bmjopen-2014-006777
7. Wang H-Y, Huang CL-C, Feng IJ, Tsuang H-C. Second-generation antipsychotic medications and risk of chronic kidney disease in schizophrenia: population-based nested case-control study. *BMJ Open*. 2018;8(5):e019868. doi:10.1136/bmjopen-2017-019868
8. Romagnani P, Remuzzi G, Glassock R, et al. Chronic kidney disease. *Nat Rev Dis Primer*. 2017;3(1). doi:10.1038/nrdp.2017.88
9. McLoughlin C, Cooney C, Mullaney R. Clozapine-induced interstitial nephritis in a patient with schizoaffective disorder in the forensic setting: a case report and review of the literature. *Ir J Psychol Med*. Published online June 21, 2019:1-6. doi:10.1017/ipm.2019.24
10. He L, Peng Y, Fu X, Chen X, Liu H. Dibenzodiazepine Derivative Quetiapine- and Olanzapine-Induced Chronic Interstitial Nephritis. *Ren Fail*. 2013;35(5):657-659. doi:10.3109/0886022X.2013.780615
11. de Jager DJ, Grootendorst DC, Jager KJ, et al. Cardiovascular and noncardiovascular mortality among patients starting dialysis. *JAMA*. 2009;302(16):1782-1789. doi:10.1001/jama.2009.1488
12. Henriksen DP, Damkier P, Hallas J, Nybo M. Sixteen years of creatinine measurements among 460 000 individuals-The Funen Laboratory Cohort

- (FLaC), a population-based pharmacoepidemiological resource to study drug-induced kidney disease. *Basic Clin Pharmacol Toxicol*. 2019;124(5):582-590. doi:10.1111/bcpt.13167
13. Pedersen CB. The Danish Civil Registration System. *Scand J Public Health*. 2011;39(7 Suppl):22-25. doi:10.1177/1403494810387965
  14. Schmidt M, Pedersen L, Sørensen HT. The Danish Civil Registration System as a tool in epidemiology. *Eur J Epidemiol*. 2014;29(8):541-549. doi:10.1007/s10654-014-9930-3
  15. Schmidt M, Schmidt SAJ, Sandegaard JL, Ehrenstein V, Pedersen L, Sørensen HT. The Danish National Patient Registry: a review of content, data quality, and research potential. *Clin Epidemiol*. 2015;7:449-490. doi:10.2147/CLEP.S91125
  16. Jensen VM, Rasmussen AW. Danish education registers. *Scand J Public Health*. 2011;39(7\_suppl):91-94. doi:10.1177/1403494810394715
  17. Pottegård A, Schmidt SAJ, Wallach-Kildemoes H, Sørensen HT, Hallas J, Schmidt M. Data Resource Profile: The Danish National Prescription Registry. *Int J Epidemiol*. 2017;46(3):798-798f. doi:10.1093/ije/dyw213
  18. Henriksen DP, Rasmussen L, Hansen MR, Hallas J, Pottegård A. Comparison of the Five Danish Regions Regarding Demographic Characteristics, Healthcare Utilization, and Medication Use--A Descriptive Cross-Sectional Study. *PloS One*. 2015;10(10):e0140197. doi:10.1371/journal.pone.0140197
  19. KDIGO 2012 Clinical Practice Guideline for the Evaluation and Management of Chronic Kidney Disease. *KDIGO 2012 Clin Pract Guidel Eval Manag Chronic Kidney Dis*. 2013;3(1):1-150. doi:10.1038/kisup.2012.77
  20. Stevens LA, Schmid CH, Greene T, et al. Comparative Performance of the CKD Epidemiology Collaboration (CKD-EPI) and the Modification of Diet in Renal Disease (MDRD) Study Equations for Estimating GFR Levels Above 60 mL/min/1.73 m<sup>2</sup>. *Am J Kidney Dis Off J Natl Kidney Found*. 2010;56(3):486-495. doi:10.1053/j.ajkd.2010.03.026
  21. Kessing LV, Gerds TA, Feldt-Rasmussen B, Andersen PK, Licht RW. Use of Lithium and Anticonvulsants and the Rate of Chronic Kidney Disease: A Nationwide Population-Based Study. *JAMA Psychiatry*. 2015;72(12):1182-1191. doi:10.1001/jamapsychiatry.2015.1834
  22. WHOCC - ATC/DDD Index. Accessed April 29, 2019. [https://www.whocc.no/atc\\_ddd\\_index/](https://www.whocc.no/atc_ddd_index/)
  23. Leucht S, Samara M, Heres S, Davis JM. Dose Equivalents for Antipsychotic Drugs: The DDD Method. *Schizophr Bull*. 2016;42 Suppl 1:S90-94. doi:10.1093/schbul/sbv167

- 1  
2  
3  
4  
5  
6  
7  
8  
9  
10  
11  
12  
13  
14  
15  
16  
17  
18  
19  
20  
21  
22  
23  
24  
25  
26  
27  
28  
29  
30  
31  
32  
33  
34  
35  
36  
37  
38  
39  
40  
41  
42  
43  
44  
45  
46  
47  
48  
49  
50  
51  
52  
53  
54  
55  
56  
57  
58  
59  
60
24. Thygesen LC, Daasnes C, Thaulow I, Brønnum-Hansen H. Introduction to Danish (nationwide) registers on health and social issues: structure, access, legislation, and archiving. *Scand J Public Health*. 2011;39(7 Suppl):12-16. doi:10.1177/1403494811399956
  25. Anders H-J, Huber TB, Isermann B, Schiffer M. CKD in diabetes: diabetic kidney disease versus nondiabetic kidney disease. *Nat Rev Nephrol*. 2018;14(6):361-377. doi:10.1038/s41581-018-0001-y
  26. Awdishu L, Mehta RL. The 6R's of drug induced nephrotoxicity. *BMC Nephrol*. 2017;18(1):124. doi:10.1186/s12882-017-0536-3

For peer review only

**LEGENDS TO FIGURES**

Figure 1: Graphical representation of time periods, case definition, control selection and covariate assessment

Figure 2: Association between exposure to second-generation antipsychotics and the risk of chronic kidney disease by individual drugs (aOR: Adjusted odds ratio)

For peer review only

**Table 1: Characteristics of cases and controls**

| Characteristic                          | Cases, N (%) | Controls, N (%) |
|-----------------------------------------|--------------|-----------------|
| All                                     | 21,434       | 85,576          |
| <i>Demographics</i>                     |              |                 |
| Male sex (%)                            | 10,277 (48)  | 41,010 (48)     |
| Age, median [IQR]                       | 71 [64, 78]  | 71 [64, 78]     |
| History of mental disorders             |              |                 |
| Any psychiatric disease (%)             | 1,549 (7)    | 4,828 (6)       |
| Schizophrenia (%)                       | 74 (<1)      | 217 (<1)        |
| Bipolar disease (%)                     | 120 (1)      | 356 (<1)        |
| Moderate to severe depression (%)       | 549 (3)      | 1,742 (2)       |
| Dementia (%)                            | 122 (1)      | 366 (<1)        |
| Other co-morbidities                    |              |                 |
| Acute kidney injury (%)                 | 2,436 (11)   | 2,477 (3)       |
| Diabetes (%)                            | 3,057 (14)   | 8,138 (10)      |
| Hypertension (%)                        | 13,962 (65)  | 47,095 (55)     |
| Antipsychotic exposure                  |              |                 |
| Second-generation antipsychotics (%)    | 557 (3)      | 1,731 (2)       |
| Quetiapine (%)                          | 173 (1)      | 504 (1)         |
| Aripiprazole (%)                        | 8 (<1)       | 41 (<1)         |
| Risperidone (%)                         | 299 (1)      | 967 (1)         |
| Olanzapine (%)                          | 220 (1)      | 593 (1)         |
| Clozapine (%)                           | 37 (<1)      | 82 (<1)         |
| Exposure to other medications           |              |                 |
| Prior use of lithium (%)                | 210 (1)      | 563 (1)         |
| Recent use of NSAIDs (%)                | 5,610 (26)   | 20,081 (23)     |
| Highest achieved level of education (%) |              |                 |
| Level 1                                 | 10,250 (48)  | 38,385 (45)     |
| Level 2                                 | 6,785 (32)   | 27,778 (32)     |
| Level 3                                 | 2,687 (13)   | 12,727 (15)     |
| Unknown                                 | 1,712 (8)    | 6,686 (8)       |

**Table 2: Odds ratios (OR) for chronic kidney disease with use of second-generation antipsychotics**

| Exposure                        | Cases, N (%)<br>(N = 21434) | Controls, N (%)<br>(N = 85576) | Crude OR (95% CI) | Adjusted OR (95% CI) |
|---------------------------------|-----------------------------|--------------------------------|-------------------|----------------------|
| Never use                       | 20877                       | 83845                          | 1 (ref)           | 1 (ref)              |
| Ever use                        | 557                         | 1731                           | 1.29 (1.17-1.42)  | 1.24 (1.12-1.37)     |
| Current use                     | 399                         | 1206                           | 1.32 (1.18-1.49)  | 1.26 (1.12-1.42)     |
| Cumulative use (olanzapine eq.) |                             |                                |                   |                      |
| 0-899mg                         | 380                         | 1246                           | 1.22 (1.09-1.37)  | 1.17 (1.04-1.32)     |
| 900-1799mg                      | 52                          | 124                            | 1.70 (1.23-2.36)  | 1.60 (1.15-2.23)     |
| 1800-3649mg                     | 29                          | 121                            | 0.96 (0.64-1.43)  | 0.91 (0.60-1.38)     |
| >3650mg                         | 96                          | 240                            | 1.60 (1.26-2.03)  | 1.46 (1.14-1.86)     |
| Number of prescriptions         |                             |                                |                   |                      |
| 1-2                             | 144                         | 450                            | 1.28 (1.06-1.54)  | 1.22 (1.01-1.48)     |
| 3-4                             | 76                          | 236                            | 1.28 (0.98-1.66)  | 1.24 (0.95-1.62)     |
| 5-10                            | 68                          | 240                            | 1.14 (0.87-1.50)  | 1.06 (0.80-1.39)     |
| 11-30                           | 115                         | 409                            | 1.12 (0.91-1.38)  | 1.10 (0.89-1.36)     |
| >30                             | 154                         | 396                            | 1.57 (1.30-1.89)  | 1.45 (1.19-1.76)     |

**Table 3: Association between exposure to second-generation antipsychotics and the risk of chronic kidney disease by subgroups (risk of metabolic disturbances, recent use of NSAIDs, pre-existing diabetes, hypertension, prior acute kidney injury (AKI), and age)**

| Exposure     |               | Cases, N  | Controls, N | Crude OR (95% CI) | Adjusted OR (95% CI) |
|--------------|---------------|-----------|-------------|-------------------|----------------------|
| All          |               | N = 21434 | N = 85576   |                   |                      |
| SGA          | Low risk      | 8         | 41          | 0.85 (0.39-1.82)  | 0.71 (0.32-1.54)     |
|              | Mild risk     | 298       | 947         | 1.26 (1.10-1.44)  | 1.21 (1.06-1.39)     |
|              | Moderate risk | 118       | 372         | 1.28 (1.04-1.58)  | 1.19 (0.96-1.48)     |
|              | High risk     | 133       | 371         | 1.43 (1.17-1.74)  | 1.36 (1.11-1.68)     |
| NSAID        | No            | 15824     | 947         | 1.29 (1.15-1.45)  | 1.22 (1.08-1.38)     |
|              | Yes           | 5610      | 20081       | 1.13 (0.84-1.51)  | 1.10 (0.81-1.49)     |
| Diabetes     | No            | 18377     | 77438       | 1.27 (1.14-1.41)  | 1.24 (1.11-1.39)     |
|              | Yes           | 3057      | 8138        | 1.56 (0.96-2.53)  | 1.52 (0.90-2.54)     |
| Hypertension | No            | 7472      | 38481       | 1.43 (1.19-1.72)  | 1.33 (1.10-1.60)     |
|              | Yes           | 13962     | 47095       | 1.21 (1.05-1.39)  | 1.14 (0.98-1.32)     |
| Prior AKI    | No            | 18998     | 83099       | 1.31 (1.18-1.47)  | 1.27 (1.14-1.42)     |
|              | Yes           | 2436      | 2477        | 1.24 (0.59-2.58)  | 0.96 (0.45-2.07)     |
| Age group    | <65           | 5847      | 23423       | 1.66 (1.40-1.97)  | 1.50 (1.25-1.80)     |
|              | 65+           | 15587     | 62153       | 1.15 (1.02-1.30)  | 1.13 (1.00-1.28)     |



BMJ Open  
Index date  
(Case: eGFR < 60;  
Control: Assigned date

Eligibility criteria:

Living on Funen on 01-01-2001  
Min. 2 creatinine measurements

Ever use / Dx

Covariates:  
Current use  
Recent use

eGFR < 60

Exclusion:  
Possible CKD  
Age < 18

Control:  
First eGFR  $\geq$  60  
[day 1 ; day 365]

Case:  
All eGFRs < 60  
[day 0; day 90+]

Observation period

1st Creatinine  
after 01-01-2001

Last creatinine

For peer review only - <http://bmjopen.bmj.com/site/about/guidelines.xhtml>

aOR (95%CI)



**SUPPLEMENTARY MATERIAL****Second-generation antipsychotics and the Risk of Chronic Kidney Disease: A Population-based Case-Control Study**

Højlund M, Lund LC, Herping JLE, Haastrup MB, Damkier P, Henriksen DP  
2020

## Contents

|                                                                                                                 |   |
|-----------------------------------------------------------------------------------------------------------------|---|
| Appendix 1: Definitions for exposures, outcomes and confounders .....                                           | 2 |
| Appendix 2: Supplementary analysis of association between risk factors, negative control exposure and CKD ..... | 3 |
| Appendix 3: Association between CKD and cumulated dose of SGA modeled using restricted cubic splines .....      | 4 |
| Appendix 4: Sensitivity analysis with modified eligibility criteria for controls.....                           | 5 |
| References .....                                                                                                | 6 |

## Appendix 1: Definitions for exposures, outcomes and confounders

| <b>Study drugs</b>                             | ATC code                                                                                        | DDD<br>(mg)       | Equivalent to 1mg<br>olanzapine (mg) | Risk of metabolic<br>disturbances (1) |
|------------------------------------------------|-------------------------------------------------------------------------------------------------|-------------------|--------------------------------------|---------------------------------------|
| (Second-generation antipsychotics)             |                                                                                                 |                   |                                      |                                       |
| Aripiprazole                                   | N05AX12                                                                                         | 15                | 1.5                                  | Low                                   |
| Clozapine                                      | N05AH02                                                                                         | 300               | 30                                   | High                                  |
| Olanzapine                                     | N05AH03                                                                                         | 10                | -                                    | High                                  |
| Risperidone                                    | N05AX08                                                                                         | 5                 | 0.5                                  | Mild                                  |
| Quetiapine                                     | N05AH04                                                                                         | 400               | 40                                   | Moderate                              |
| <b>Other medications</b>                       |                                                                                                 |                   |                                      |                                       |
| Non-steroidal anti-inflammatory drugs (NSAIDs) | M01A, excl. M01AX01                                                                             |                   |                                      |                                       |
| Lithium                                        | N05AN01                                                                                         |                   |                                      |                                       |
| <b>Comorbidities</b>                           |                                                                                                 | <b>Definition</b> |                                      |                                       |
| Diabetes                                       | Use of ATC-group A10                                                                            |                   |                                      |                                       |
| Hypertension                                   | Use of ATC-group C03A, C08C, C09A, C09C                                                         |                   |                                      |                                       |
| Possible CKD (2)                               | ICD-10: N00, 01, 03-06, 08.8, 14.1, 14.2, 16.8, 17-19, 25.1, 26-27                              |                   |                                      |                                       |
| Schizophrenia                                  | ICD-10: F20                                                                                     |                   |                                      |                                       |
| Bipolar affective disorder                     | ICD-10: F30-31                                                                                  |                   |                                      |                                       |
| Dementia                                       | ICD-10: F00-03 and G30-31                                                                       |                   |                                      |                                       |
| Prior AKI                                      | Defined using creatinine measurements according to Kidney Disease Improving Global Outcomes (3) |                   |                                      |                                       |

**Appendix 2: Supplementary analysis of association between risk factors, negative control exposure and CKD**

|                                   | Crude OR (95% CI) | Adjusted OR (95% CI) |
|-----------------------------------|-------------------|----------------------|
| <b>Positive control exposures</b> |                   |                      |
| History of diabetes               | 1.59 (1.52-1.67)  | 1.45 (1.38-1.52)     |
| History of hypertension           | 1.56 (1.51-1.61)  | 1.50 (1.45-1.55)     |
| Prior use of lithium              | 1.50 (1.28-1.76)  | 1.60 (1.36-1.87)     |
| Recent use of NSAID               | 1.16 (1.12-1.20)  | 1.14 (1.10-1.18)     |
| <b>Negative control exposure</b>  |                   |                      |
| Use of ocular topical antibiotics | 0.95 (0.90-1.00)  | 0.93 (0.88-0.98)     |

**Appendix 3: Association between CKD and cumulated dose of SGA modeled using restricted cubic splines**

10%-percentile: 5 mg OLA eq, 50%-percentile: 250mg OLA eq, 90%-percentile: 11,200 mg OLA eq. Percentiles were derived from cumulative doses among cases. CI: Confidence interval, OLA eq: Olanzapine equivalents, OR: Odds ratio.

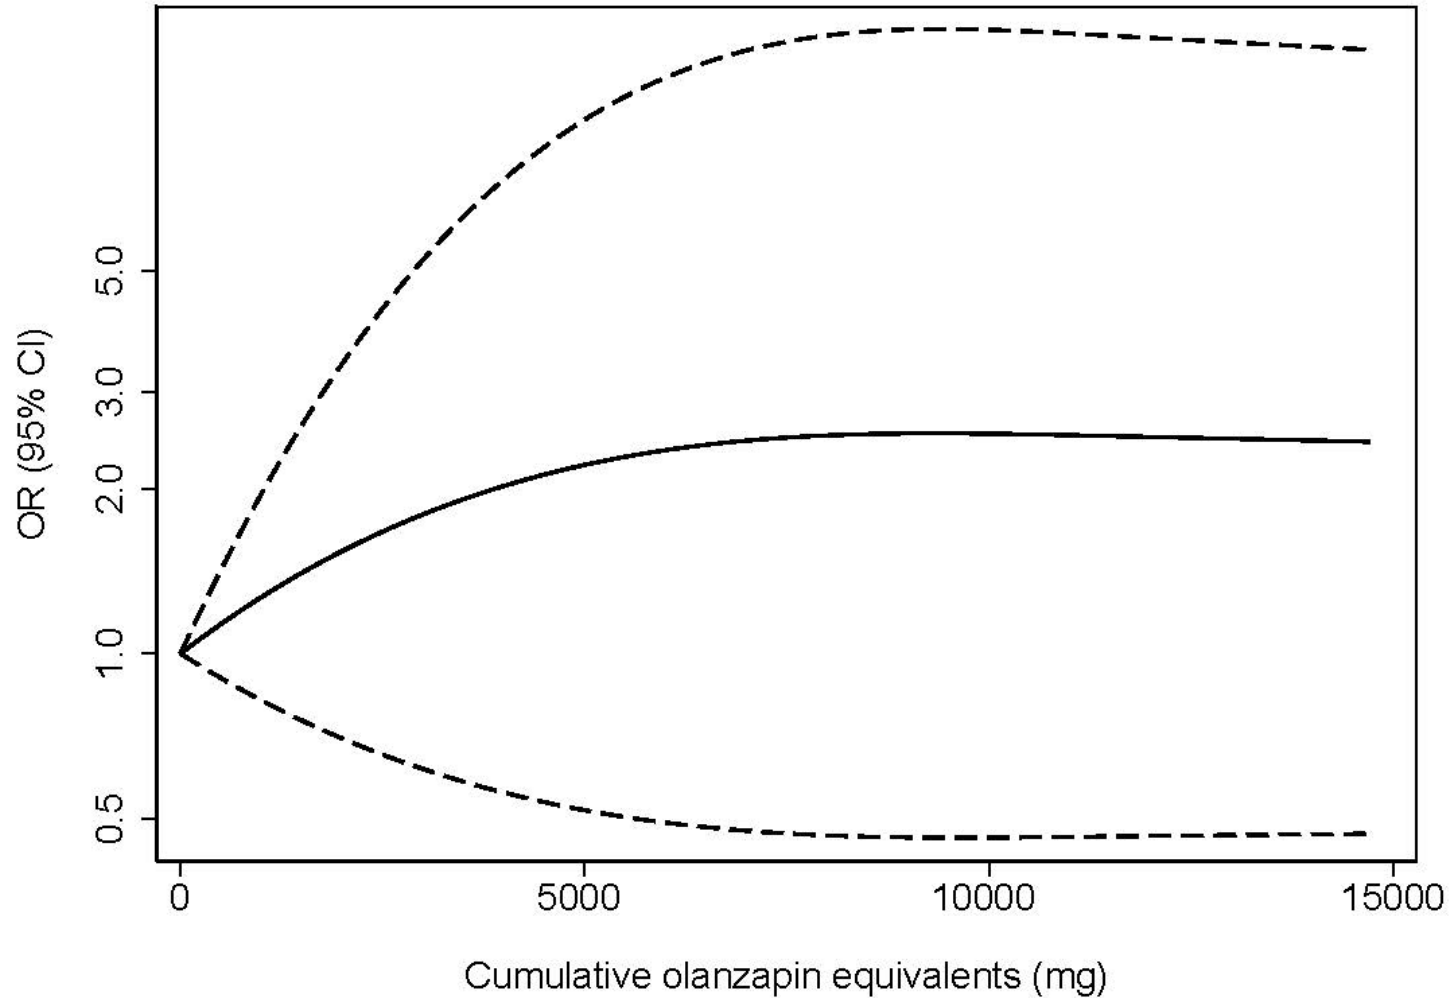

#### Appendix 4: Sensitivity analysis with modified eligibility criteria for controls

|                         | Cases<br>(N=21434) | Controls<br>(N=85654) | Crude OR (95% CI) | Adjusted OR (95% CI) |
|-------------------------|--------------------|-----------------------|-------------------|----------------------|
| Ever use                | 557                | 1654                  | 1.36 (1.23-1.49)  | 1.27 (1.14-1.40)     |
| Current use             | 399                | 1153                  | 1.39 (1.24-1.56)  | 1.32 (1.17-1.49)     |
| Cumulative use          |                    |                       |                   |                      |
| 0-899mg                 | 380                | 1223                  | 1.25 (1.12-1.41)  | 1.17 (1.03-1.32)     |
| 900-1799mg              | 52                 | 121                   | 1.71 (1.23-2.36)  | 1.58 (1.13-2.21)     |
| 1800-3649mg             | 29                 | 100                   | 1.18 (0.78-1.78)  | 1.19 (0.78-1.83)     |
| >3650mg                 | 96                 | 210                   | 1.83 (1.44-2.34)  | 1.61 (1.25-2.08)     |
| Number of prescriptions |                    |                       |                   |                      |
| 1-2                     | 144                | 384                   | 1.50 (1.24-1.82)  | 1.38 (1.13-1.69)     |
| 3-4                     | 76                 | 229                   | 1.31 (1.01-1.70)  | 1.21 (0.93-1.59)     |
| 5-10                    | 68                 | 228                   | 1.19 (0.91-1.56)  | 1.09 (0.83-1.45)     |
| 11-30                   | 115                | 444                   | 1.05 (0.85-1.29)  | 0.99 (0.80-1.22)     |
| >30                     | 154                | 369                   | 1.69 (1.40-2.05)  | 1.55 (1.27-1.88)     |

**References**

1. De Hert M, Detraux J, van Winkel R, Yu W, Correll CU. Metabolic and cardiovascular adverse effects associated with antipsychotic drugs. *Nat Rev Endocrinol*. 2011;8:114–26.
2. Kessing LV, Gerds TA, Feldt-Rasmussen B, Andersen PK, Licht RW. Use of Lithium and Anticonvulsants and the Rate of Chronic Kidney Disease: A Nationwide Population-Based Study. *JAMA Psychiatry*. 2015;72:1182–91.
3. KDIGO 2012 Clinical Practice Guideline for the Evaluation and Management of Chronic Kidney Disease. *KDIGO 2012 Clin Pract Guidel Eval Manag Chronic Kidney Dis*. 2013;3:1–150.

For peer review only



**STROBE 2007 (v4) Statement—Checklist of items that should be included in reports of *case-control studies***

| Section/Topic                | Item # | Recommendation                                                                                                                                                                       | Reported on page # |
|------------------------------|--------|--------------------------------------------------------------------------------------------------------------------------------------------------------------------------------------|--------------------|
| <b>Title and abstract</b>    | 1      | (a) Indicate the study's design with a commonly used term in the title or the abstract                                                                                               | 1                  |
|                              |        | (b) Provide in the abstract an informative and balanced summary of what was done and what was found                                                                                  | 2                  |
| <b>Introduction</b>          |        |                                                                                                                                                                                      |                    |
| Background/rationale         | 2      | Explain the scientific background and rationale for the investigation being reported                                                                                                 | 4                  |
| Objectives                   | 3      | State specific objectives, including any prespecified hypotheses                                                                                                                     | 4                  |
| <b>Methods</b>               |        |                                                                                                                                                                                      |                    |
| Study design                 | 4      | Present key elements of study design early in the paper                                                                                                                              | 5                  |
| Setting                      | 5      | Describe the setting, locations, and relevant dates, including periods of recruitment, exposure, follow-up, and data collection                                                      | 5                  |
| Participants                 | 6      | (a) Give the eligibility criteria, and the sources and methods of case ascertainment and control selection. Give the rationale for the choice of cases and controls                  | 5                  |
|                              |        | (b) For matched studies, give matching criteria and the number of controls per case                                                                                                  | 5                  |
| Variables                    | 7      | Clearly define all outcomes, exposures, predictors, potential confounders, and effect modifiers. Give diagnostic criteria, if applicable                                             | 5-6                |
| Data sources/<br>measurement | 8*     | For each variable of interest, give sources of data and details of methods of assessment (measurement). Describe comparability of assessment methods if there is more than one group | 4-6                |
| Bias                         | 9      | Describe any efforts to address potential sources of bias                                                                                                                            | 6-7                |
| Study size                   | 10     | Explain how the study size was arrived at                                                                                                                                            | 5                  |
| Quantitative variables       | 11     | Explain how quantitative variables were handled in the analyses. If applicable, describe which groupings were chosen and why                                                         | 5-6                |
| Statistical methods          | 12     | (a) Describe all statistical methods, including those used to control for confounding                                                                                                | 6-7                |
|                              |        | (b) Describe any methods used to examine subgroups and interactions                                                                                                                  | 6-7                |
|                              |        | (c) Explain how missing data were addressed                                                                                                                                          | -                  |
|                              |        | (d) If applicable, explain how matching of cases and controls was addressed                                                                                                          | 5                  |
|                              |        | (e) Describe any sensitivity analyses                                                                                                                                                | -                  |
| <b>Results</b>               |        |                                                                                                                                                                                      |                    |

|                          |     |                                                                                                                                                                                                                                                                                                                                                                                                               |                          |
|--------------------------|-----|---------------------------------------------------------------------------------------------------------------------------------------------------------------------------------------------------------------------------------------------------------------------------------------------------------------------------------------------------------------------------------------------------------------|--------------------------|
| Participants             | 13* | (a) Report numbers of individuals at each stage of study—eg numbers potentially eligible, examined for eligibility, confirmed eligible, included in the study, completing follow-up, and analysed<br>(b) Give reasons for non-participation at each stage<br>(c) Consider use of a flow diagram                                                                                                               | 8<br>-<br>-              |
| Descriptive data         | 14* | (a) Give characteristics of study participants (eg demographic, clinical, social) and information on exposures and potential confounders<br>(b) Indicate number of participants with missing data for each variable of interest                                                                                                                                                                               | 8, table 1<br>-          |
| Outcome data             | 15* | Report numbers in each exposure category, or summary measures of exposure                                                                                                                                                                                                                                                                                                                                     | 8                        |
| Main results             | 16  | (a) Give unadjusted estimates and, if applicable, confounder-adjusted estimates and their precision (eg, 95% confidence interval). Make clear which confounders were adjusted for and why they were included<br>(b) Report category boundaries when continuous variables were categorized<br>(c) If relevant, consider translating estimates of relative risk into absolute risk for a meaningful time period | 8-9, table 2+3<br>-<br>- |
| Other analyses           | 17  | Report other analyses done—eg analyses of subgroups and interactions, and sensitivity analyses                                                                                                                                                                                                                                                                                                                | 8-9, table 2+3           |
| <b>Discussion</b>        |     |                                                                                                                                                                                                                                                                                                                                                                                                               |                          |
| Key results              | 18  | Summarise key results with reference to study objectives                                                                                                                                                                                                                                                                                                                                                      | 10                       |
| Limitations              | 19  | Discuss limitations of the study, taking into account sources of potential bias or imprecision.<br>Discuss both direction and magnitude of any potential bias                                                                                                                                                                                                                                                 | 11                       |
| Interpretation           | 20  | Give a cautious overall interpretation of results considering objectives, limitations, multiplicity of analyses, results from similar studies, and other relevant evidence                                                                                                                                                                                                                                    | 10-11                    |
| Generalisability         | 21  | Discuss the generalisability (external validity) of the study results                                                                                                                                                                                                                                                                                                                                         | 11                       |
| <b>Other information</b> |     |                                                                                                                                                                                                                                                                                                                                                                                                               |                          |
| Funding                  | 22  | Give the source of funding and the role of the funders for the present study and, if applicable, for the original study on which the present article is based                                                                                                                                                                                                                                                 | 11                       |

\*Give information separately for cases and controls in case-control studies and, if applicable, for exposed and unexposed groups in cohort and cross-sectional studies.

**Note:** An Explanation and Elaboration article discusses each checklist item and gives methodological background and published examples of transparent reporting. The STROBE checklist is best used in conjunction with this article (freely available on the Web sites of PLoS Medicine at <http://www.plosmedicine.org/>, Annals of Internal Medicine at <http://www.annals.org/>, and Epidemiology at <http://www.epidem.com/>). Information on the STROBE Initiative is available at [www.strobe-statement.org](http://www.strobe-statement.org).
